# Supplementary material for: Hydrogen-Deuterium Exchange Mass Spectrometry Reveals a Novel Binding Region of a Neutralizing Fully Human Monoclonal Antibody to Anthrax Protective Antigen
Source: MDPI journal article supplement (doi:10.3390/toxins14020092), 2022-01-25
Supplement: s1 [file s1]

# Supplementary Materials: Hydrogen–Deuterium Exchange Mass Spectrometry Reveals a Novel Binding Region of a Neutralizing Fully Human Monoclonal Antibody to Anthrax Protective Antigen

Mulin Fang, Zhe Wang, Kathleen Norris, Judith A. James, Si Wu and Kenneth Smith\*

(A)

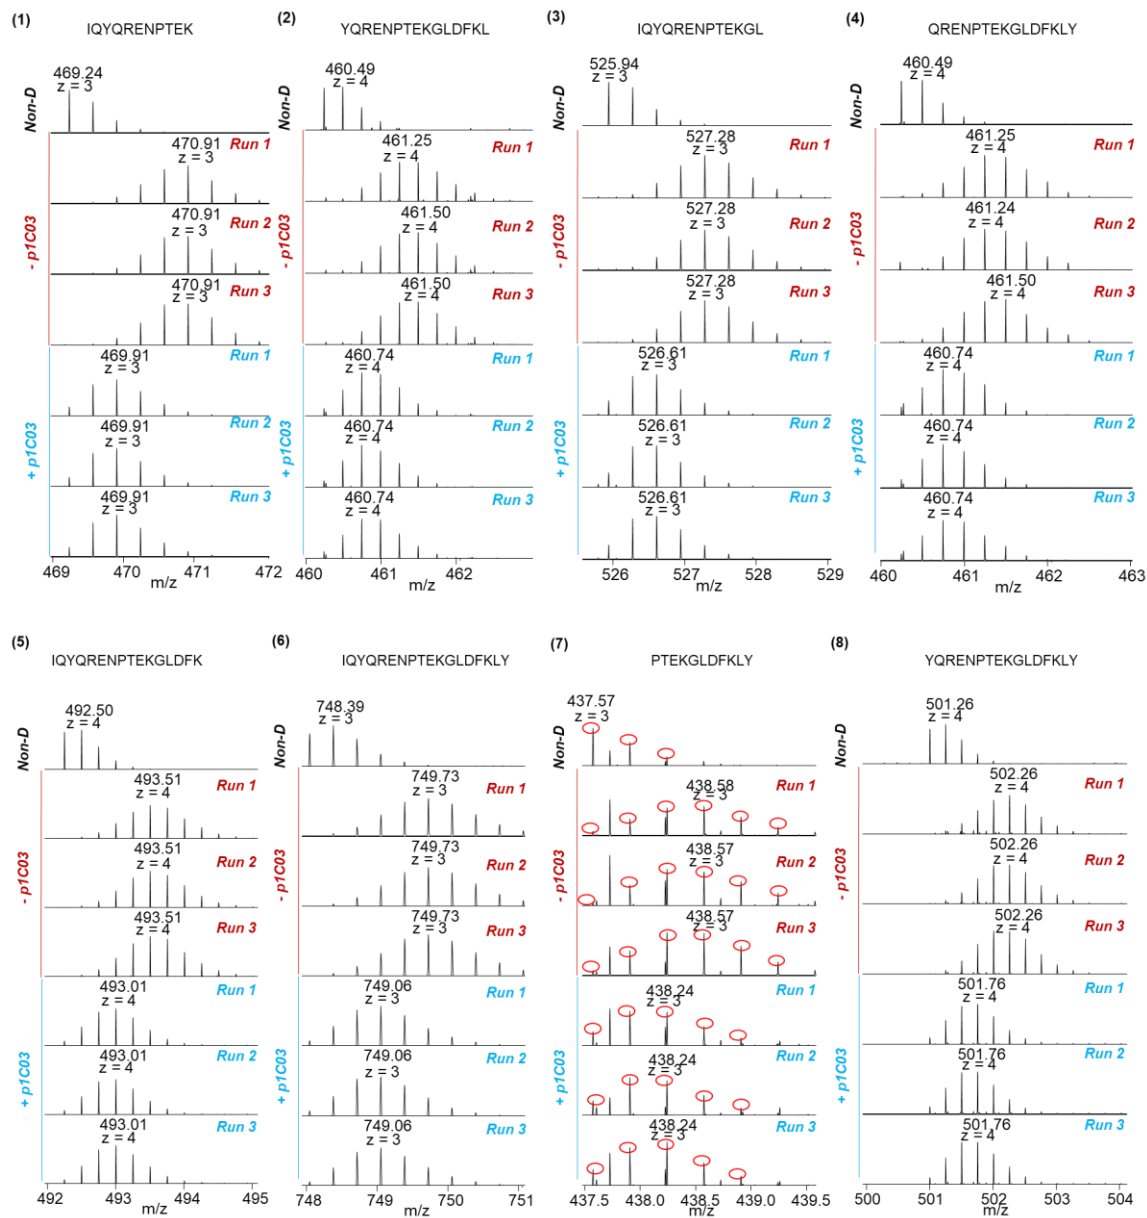

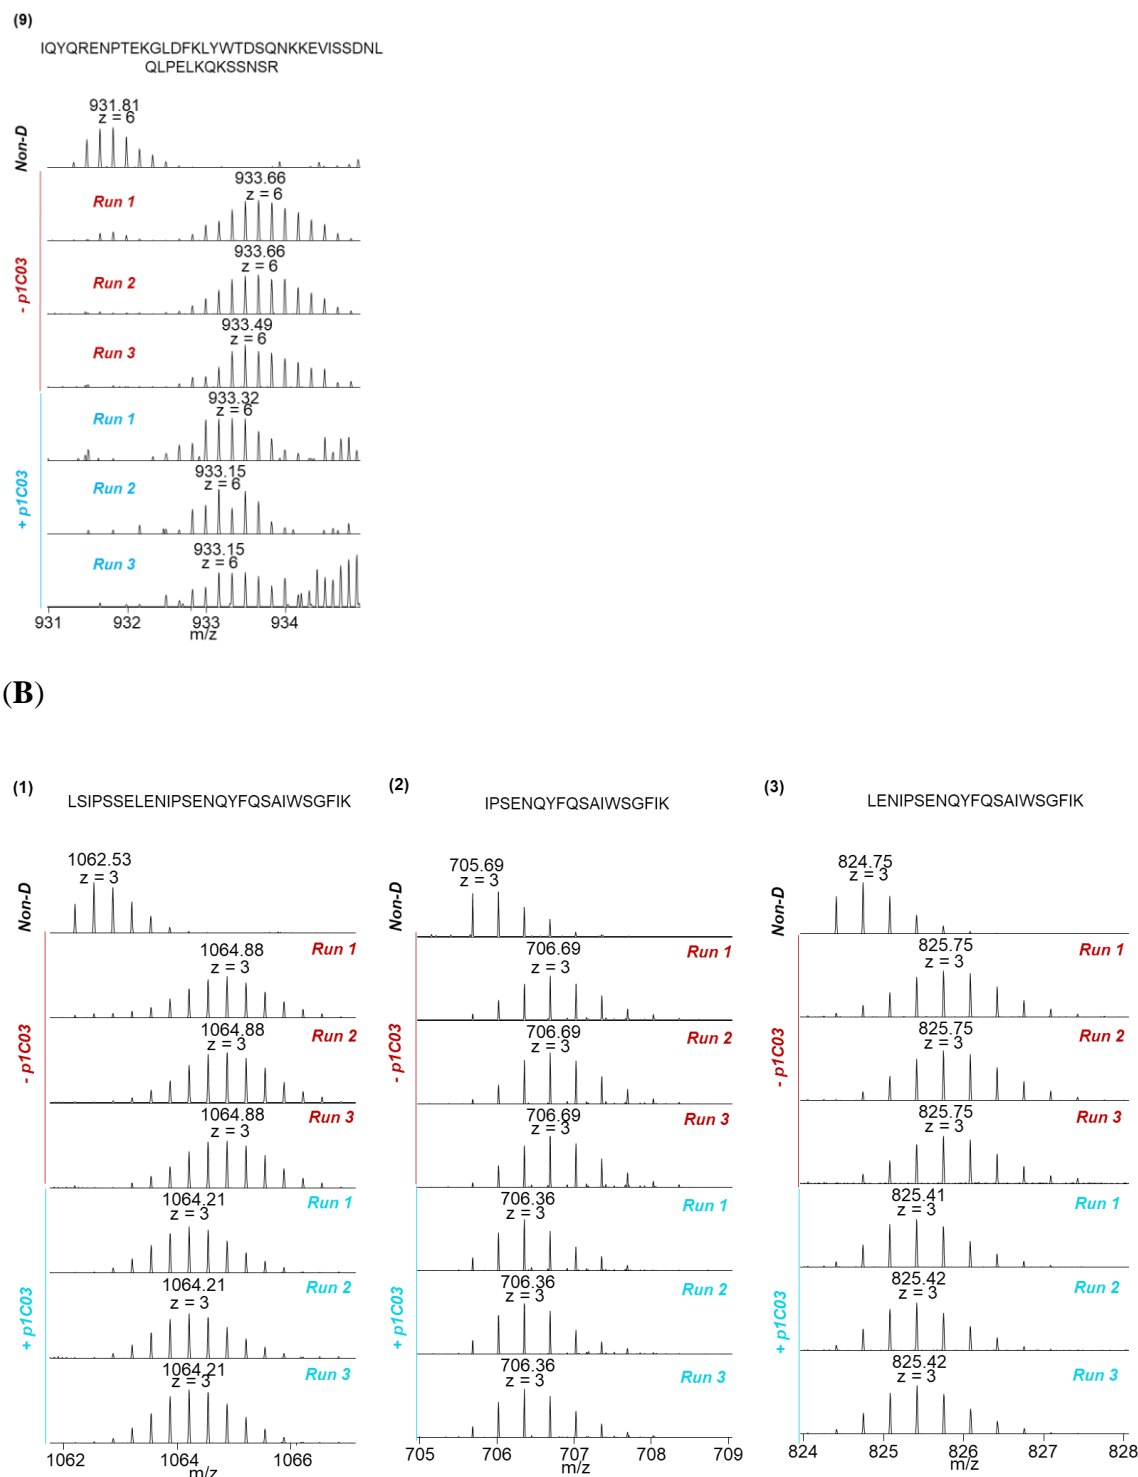

**Figure S1.** MS spectra of 12 identified peptides for p1C03 binding. (A) MS spectra of 9 identified peptides in primary epitope. (B) MS spectra of 3 identified peptides in secondary epitope. Red ovals highlight the correct peak distribution for peptide 7.

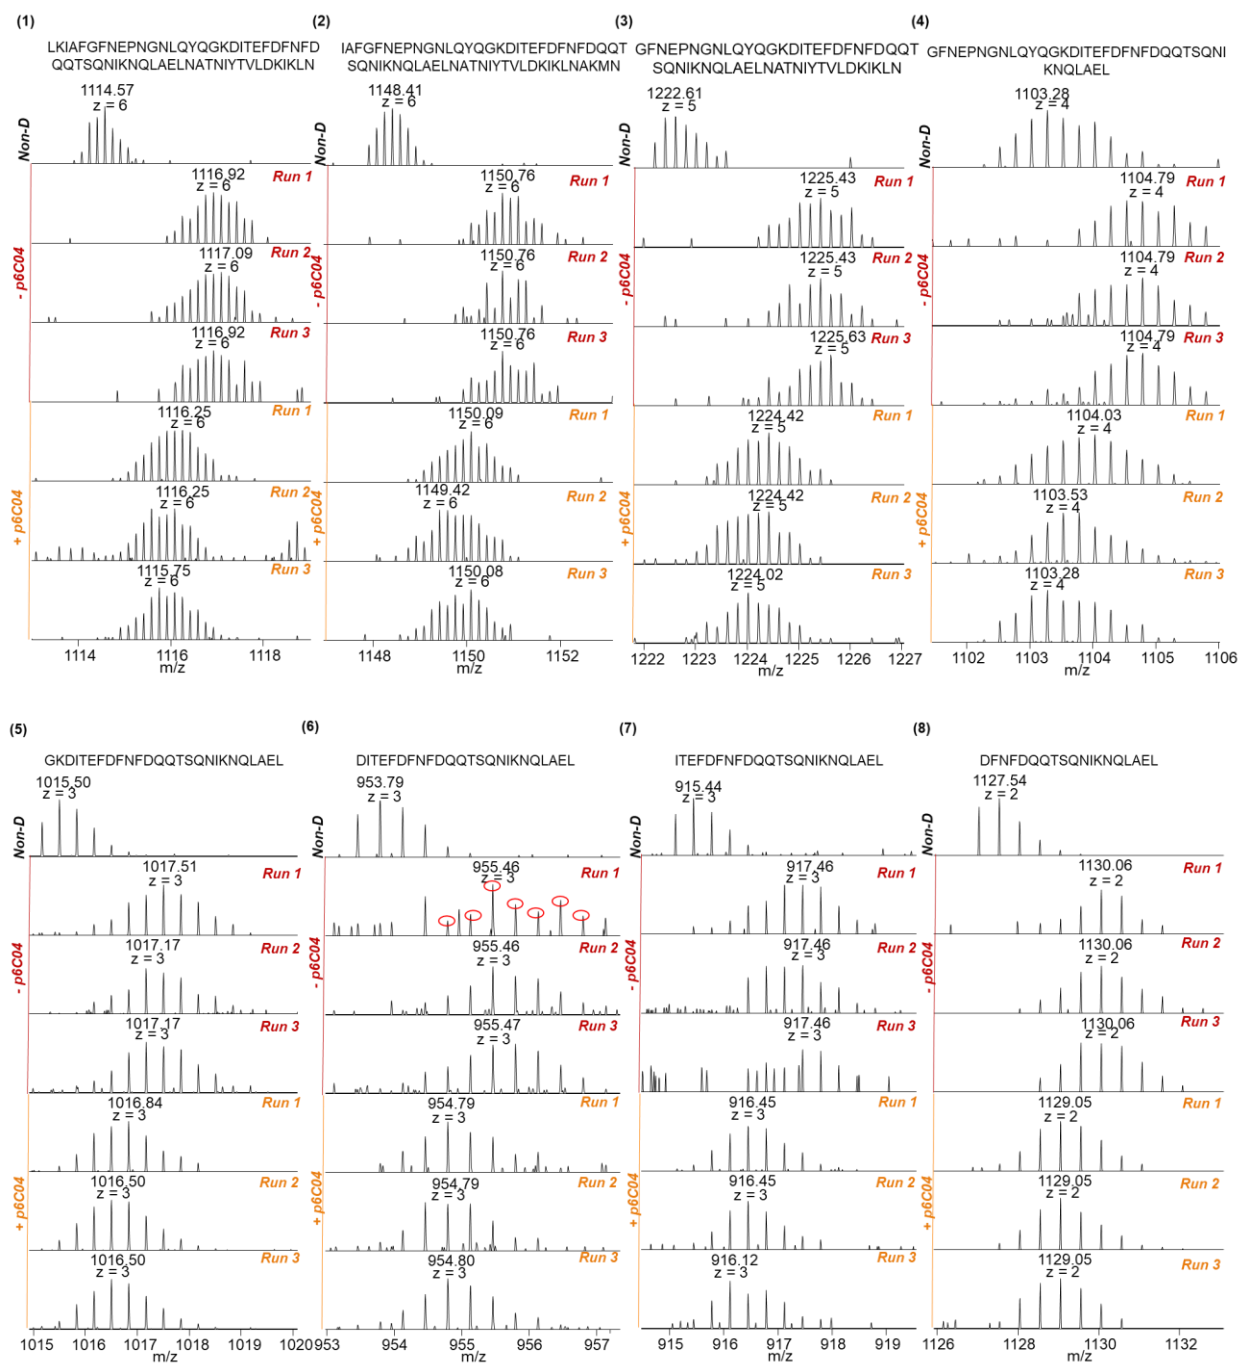

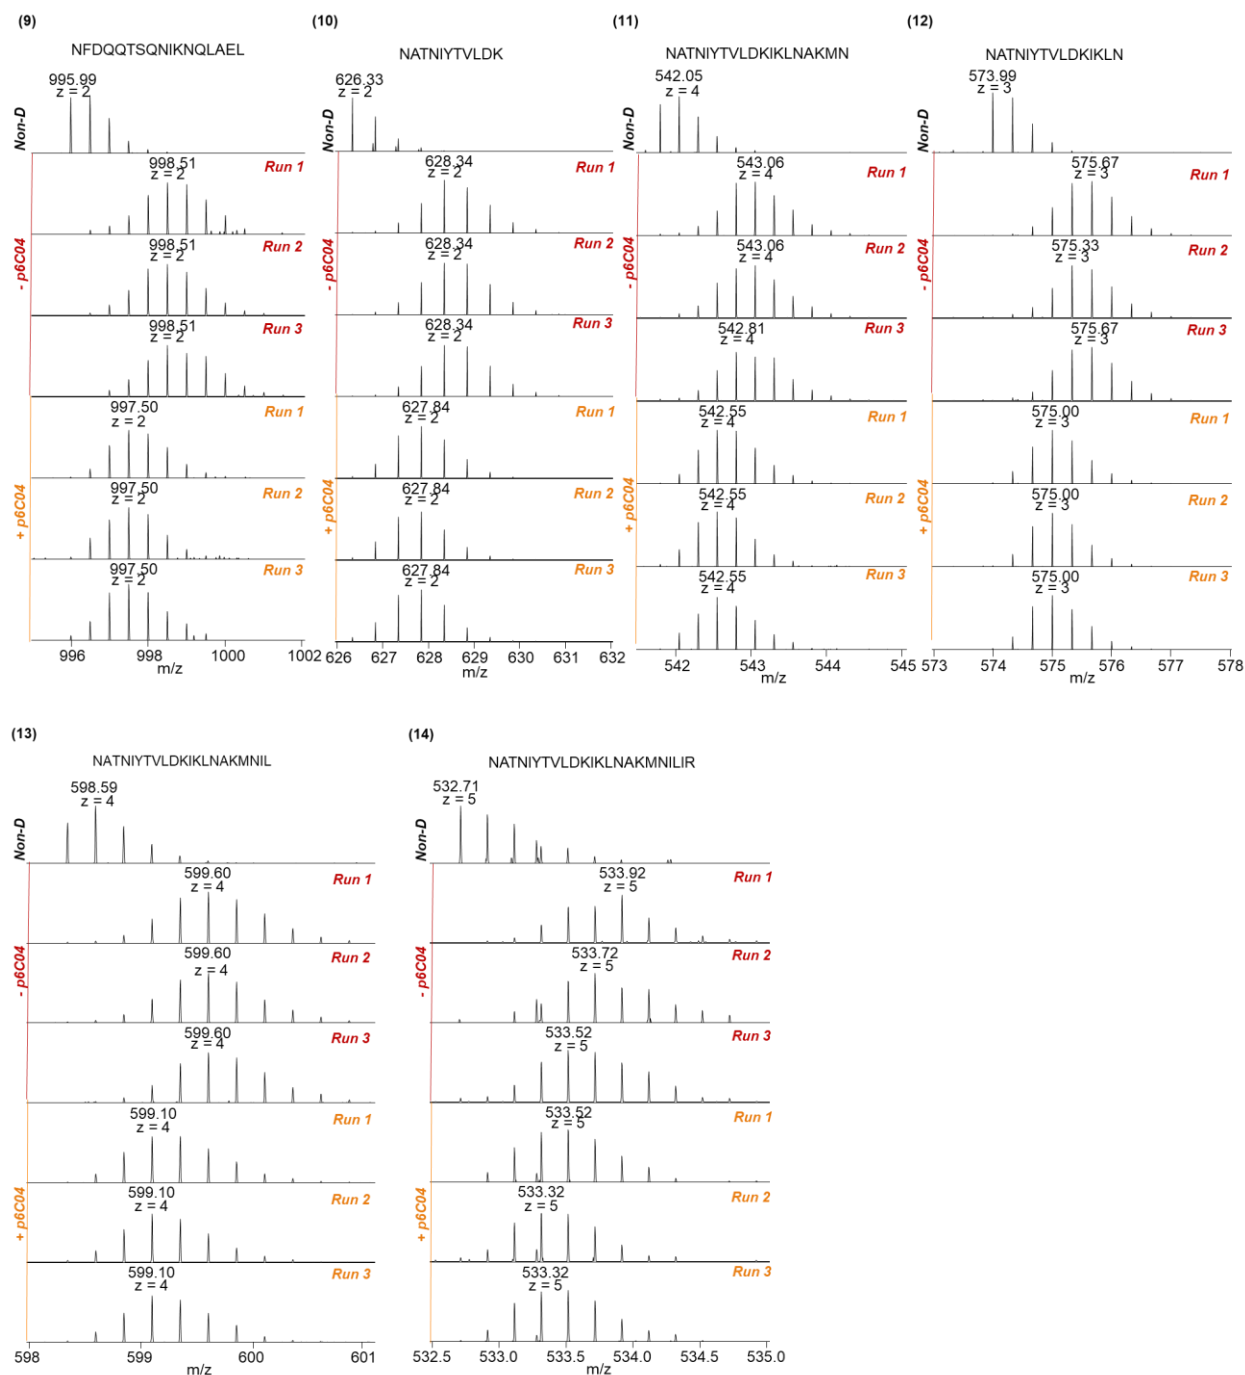

**Figure S2.** MS spectra of 14 identified peptides in primary epitope for p6C04 binding.

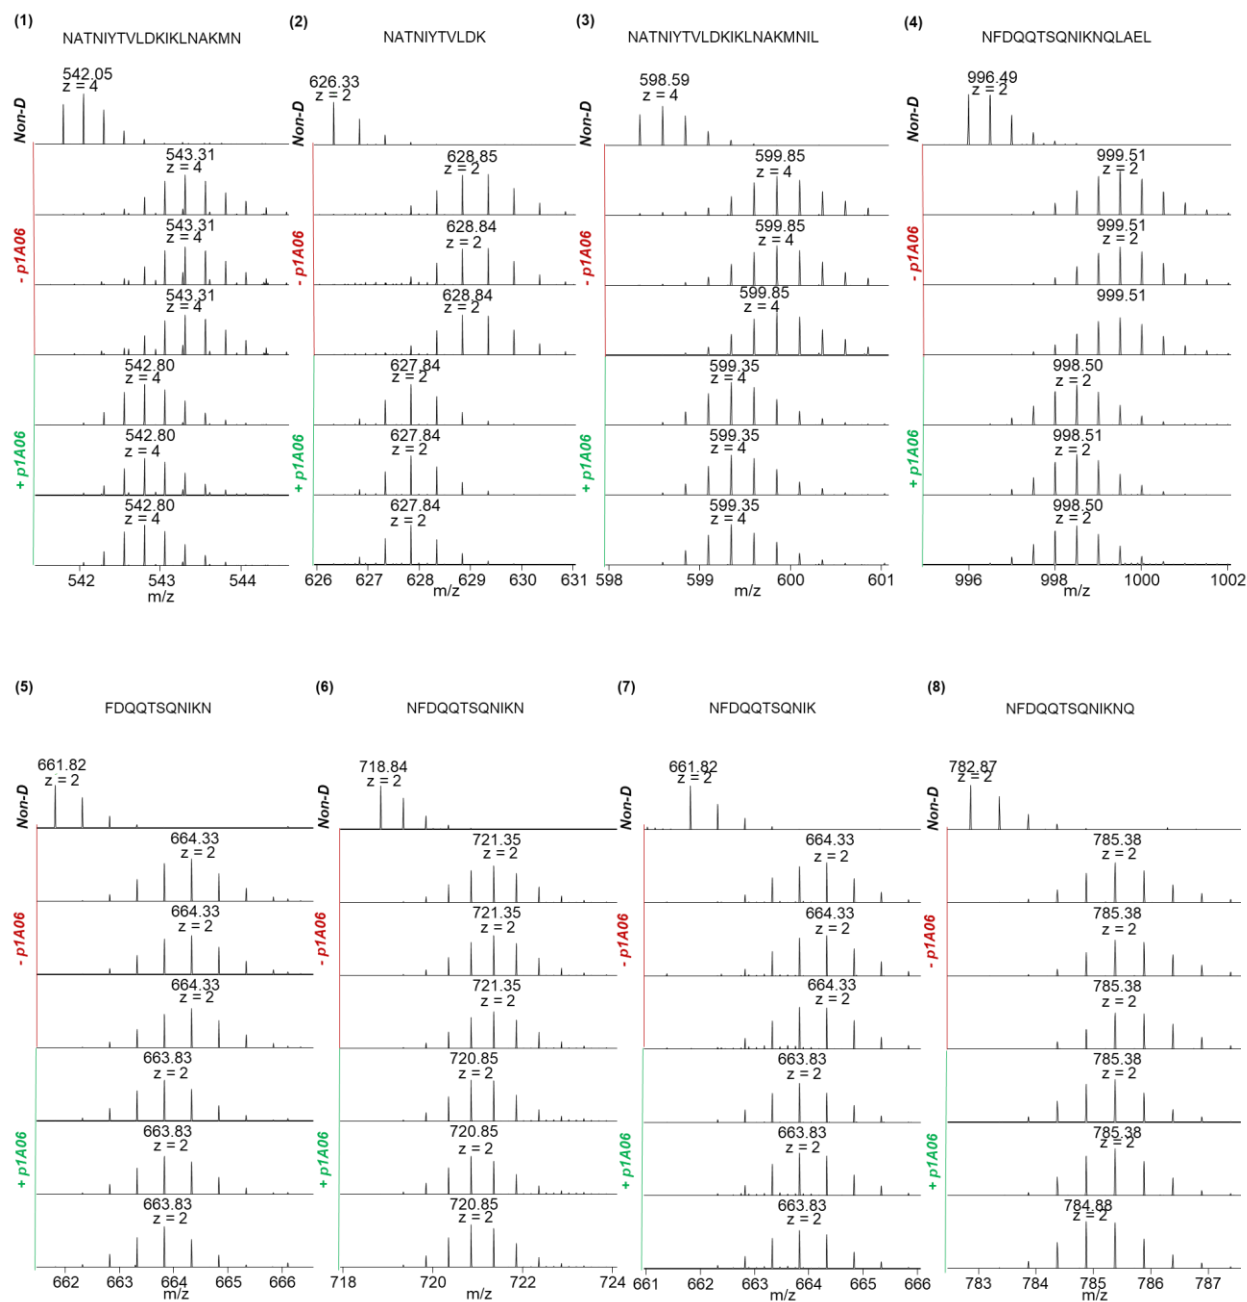

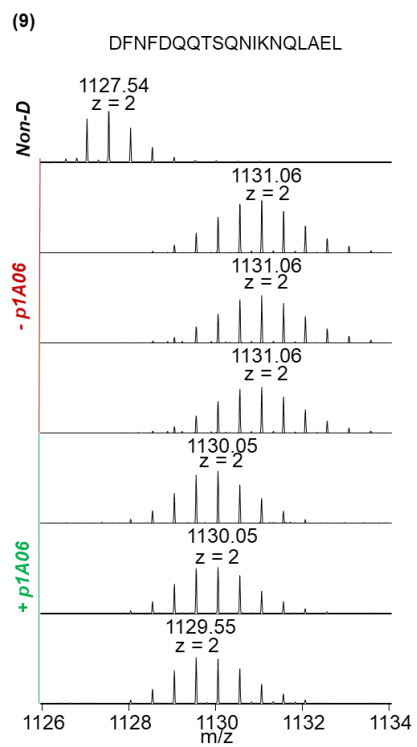

**Figure S3.** MS spectra of 9 identified peptides in primary epitope for p1A06 binding.

(A)

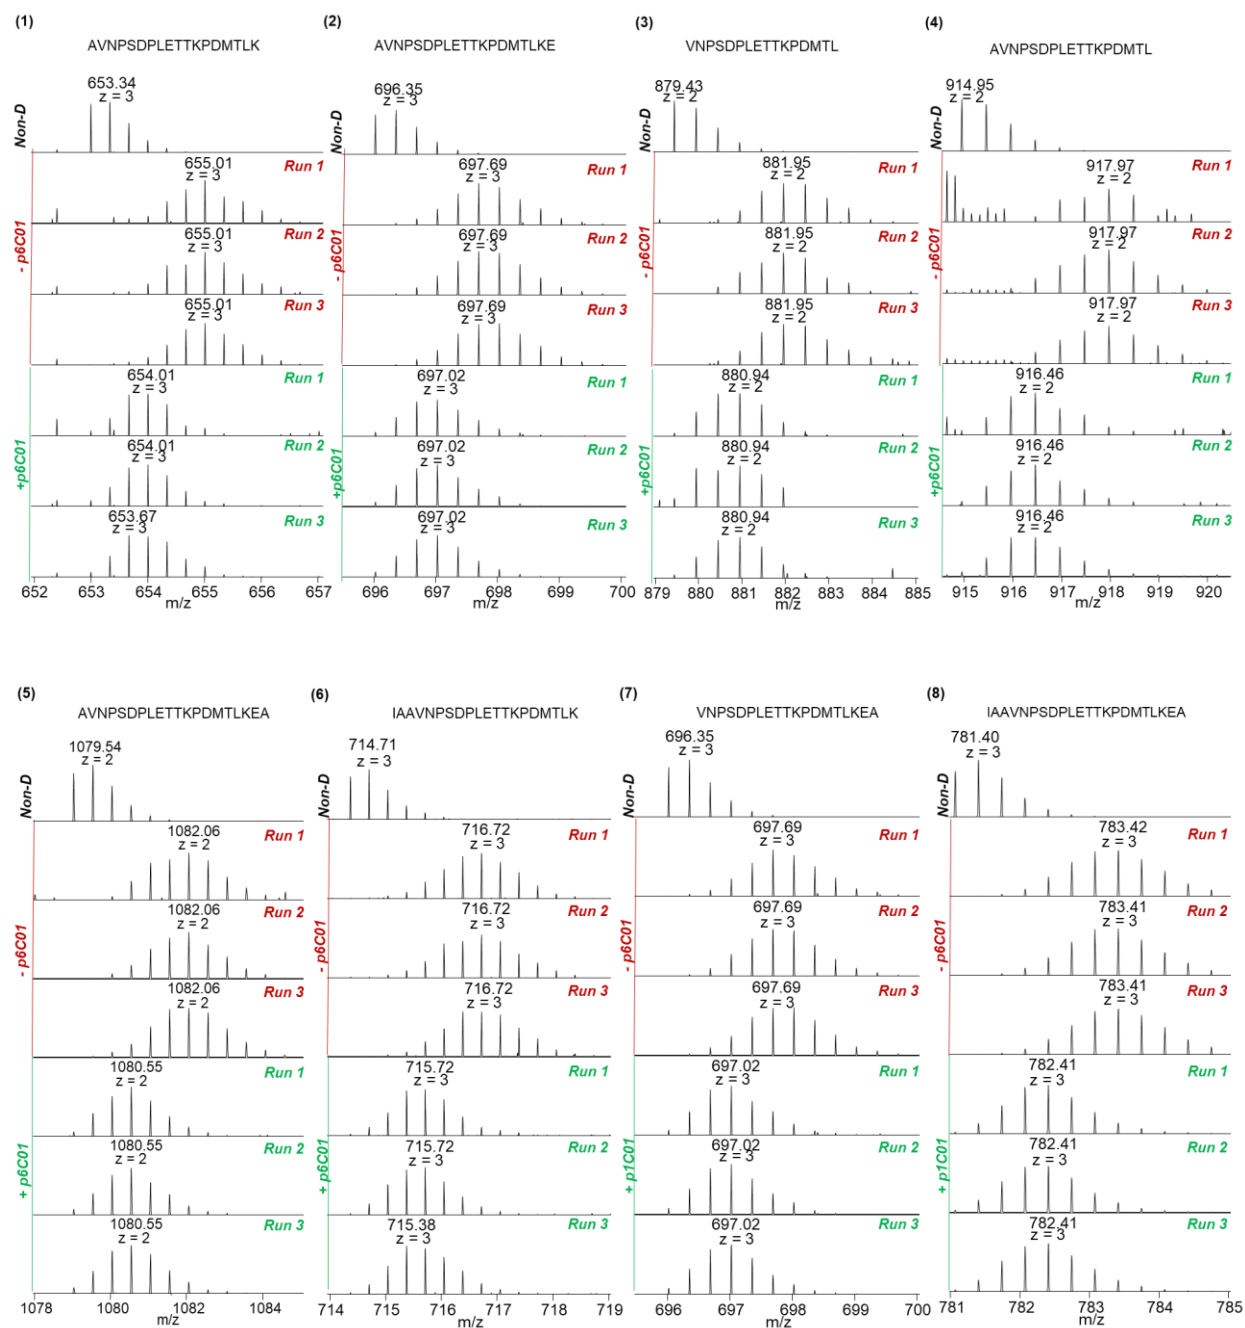

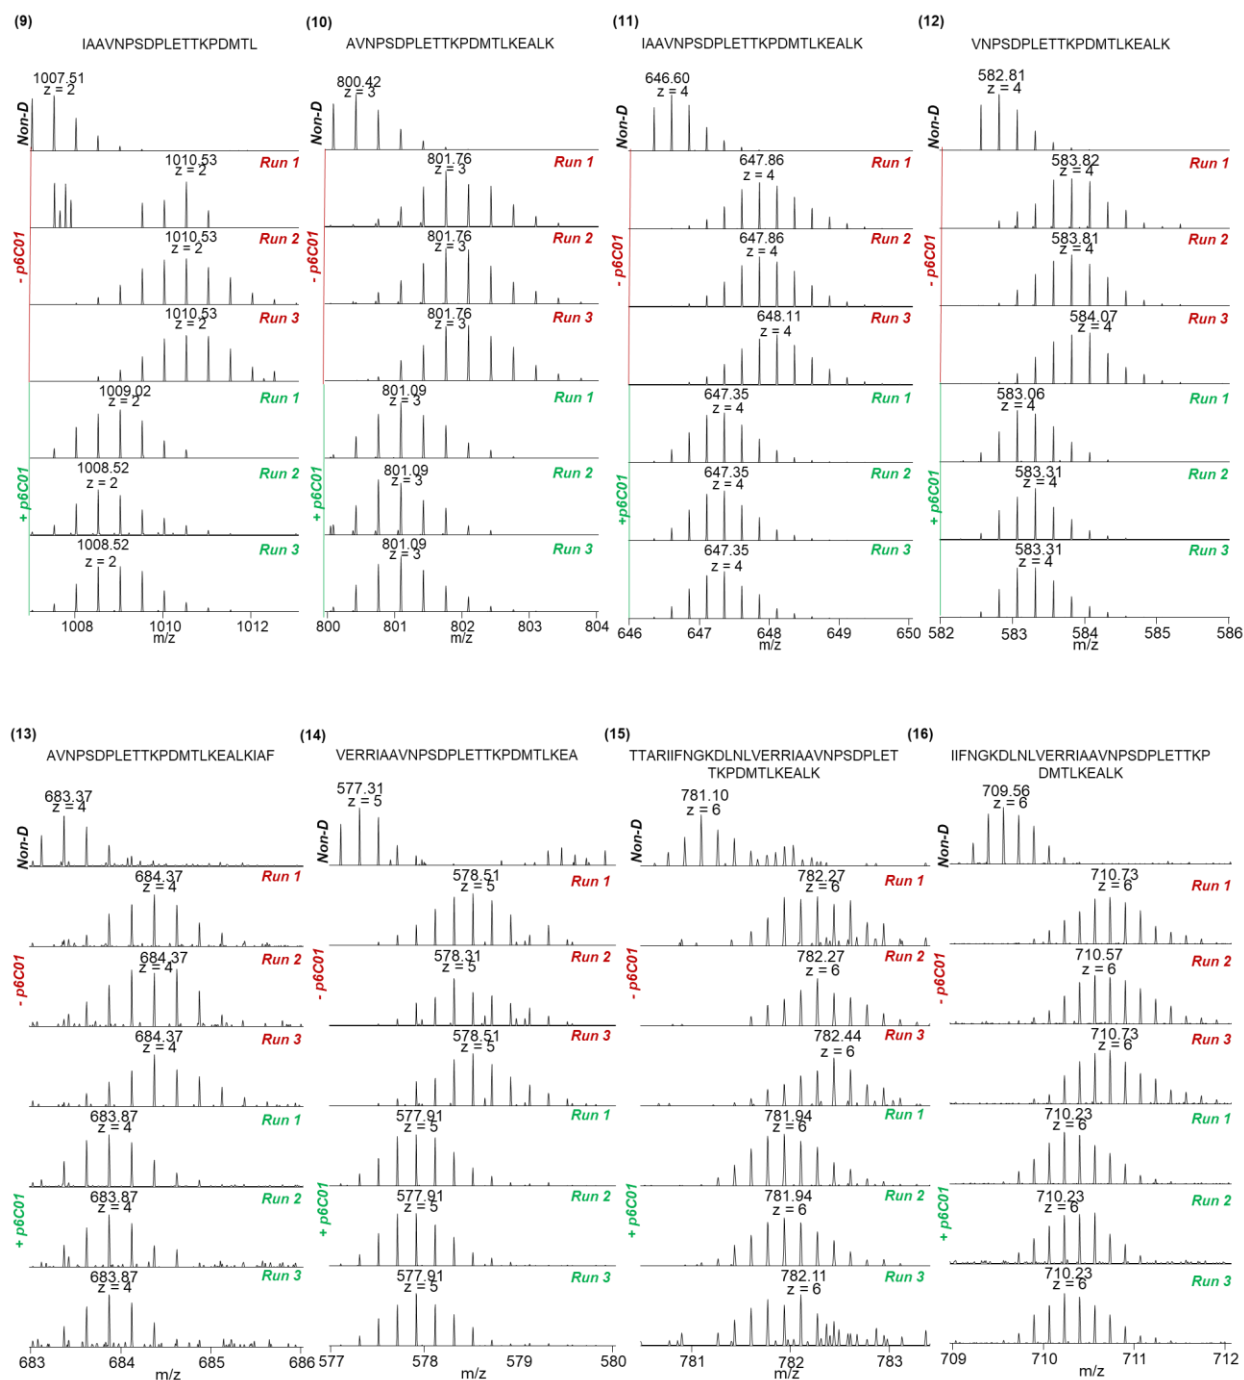



**(B)**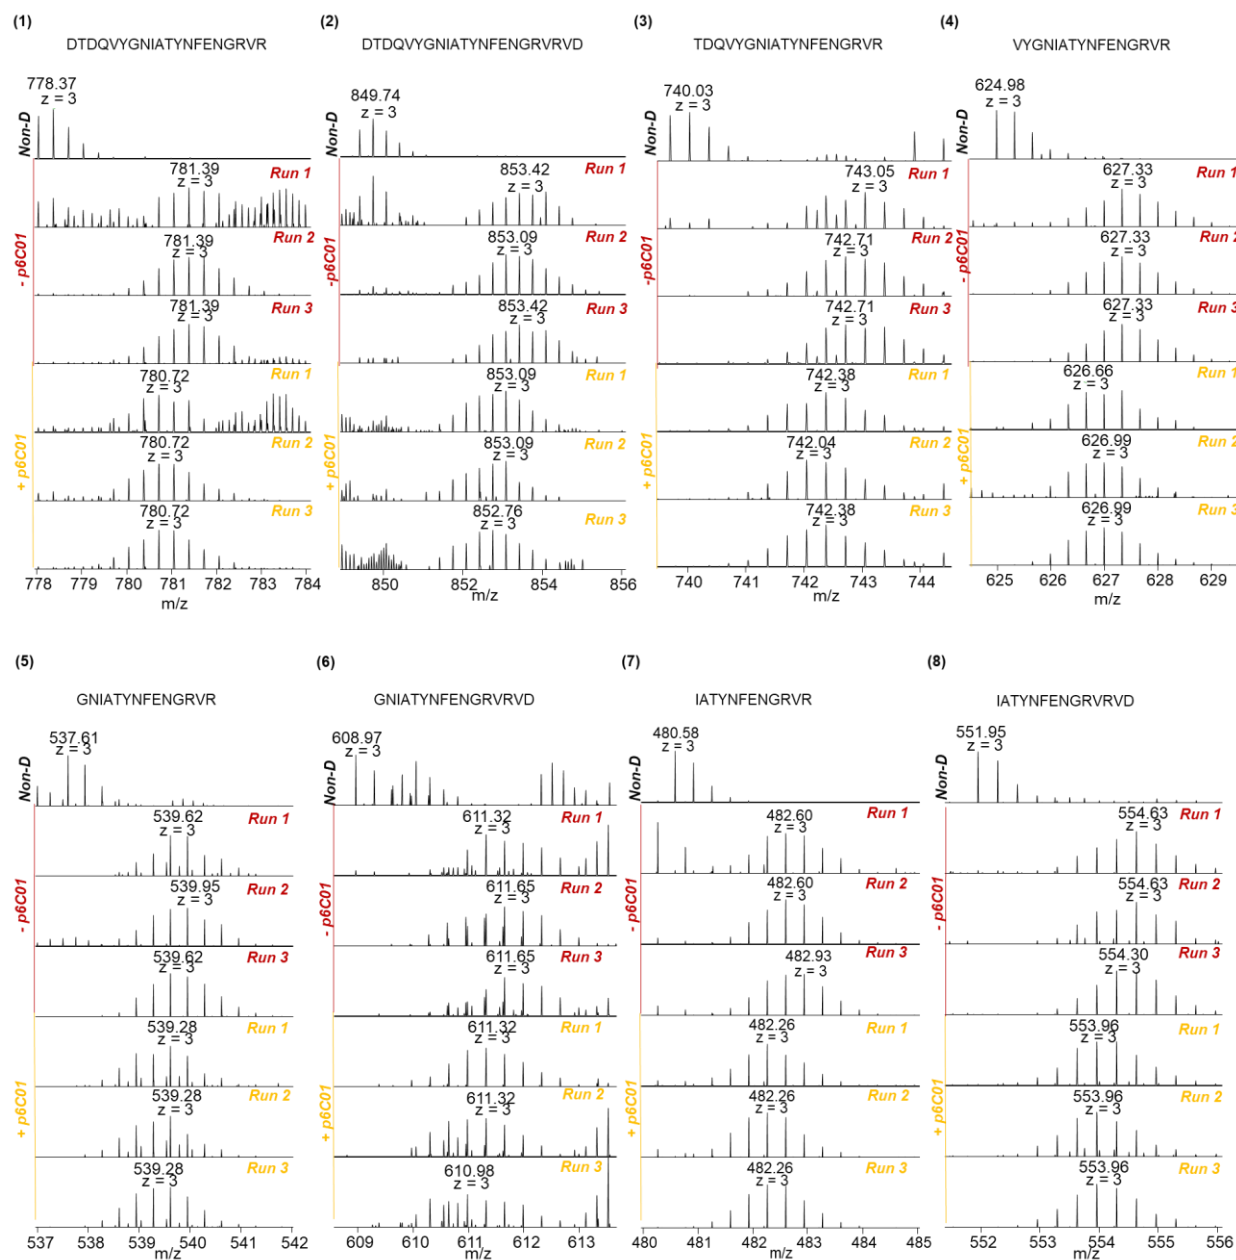

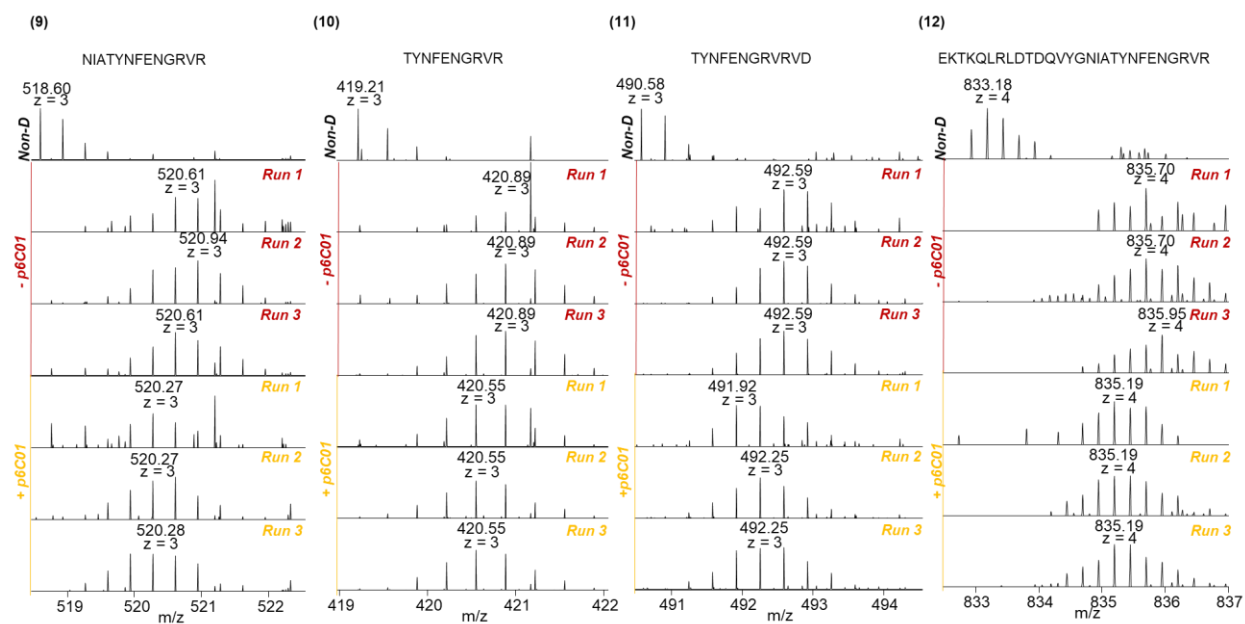

**Figure S4.** MS spectra of 28 identified peptides for p6C01 binding. (A) MS spectra of 16 identified peptides in primary epitope. (B) MS spectra of 12 identified peptides in secondary epitope.

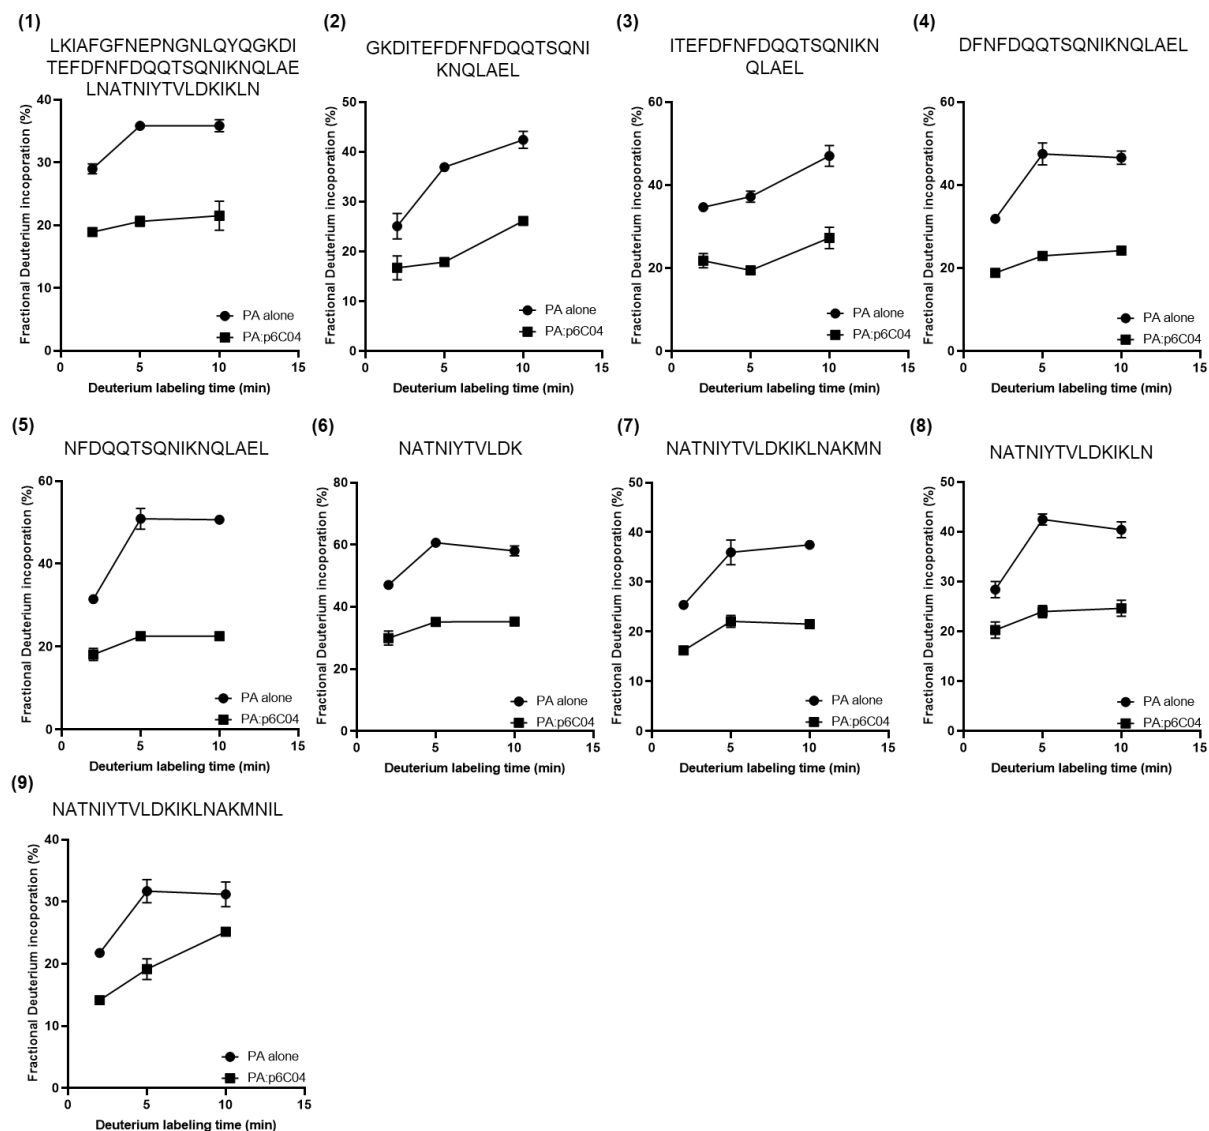

**Figure S5.** HDX time-course study for PA upon p6C04 binding. Relative fractional deuterium incorporation for 9 peptides in binding region were compared in the absence (Free PA) and presence of p6C04 (PA:p6C04) under 2 minutes, 5 minutes, and 10 minutes deuterium labeling conditions. Experiments were performed in triplicate.
