# Supplementary material for: Hydrogen-Deuterium Exchange Mass Spectrometry Reveals a Novel Binding Region of a Neutralizing Fully Human Monoclonal Antibody to Anthrax Protective Antigen
Source: Toxins (Basel). 2022 Jan 25;14(2):92. doi: 10.3390/toxins14020092 (PMC8877668; doi:10.3390/toxins14020092)
Supplement: Supplementary file 1 [file toxins-14-00092-s001.zip › Supplementary_Tables.xlsx]

## Sheet: p6C04
Peptide sequence	Charge	Retention time (min)	Average Deuterium Uptake (-p6C04) (Da)	Average deuterium uptake (+p6C04) (Da)	Deuterium Uptake Difference (PA - PA:p6C04) (Da)	Max_Deuterium (Da)	Fractional_D_Uptake_Difference(%)
AETMGLNTADTARL	2	24.1558	2.35486	2.82072	-0.465859	10.8	-4.31351
AKENQLSQILAPNNYYPSKNLAPIAL	3	29.4439	7.64469	7.59802	0.0466744	18.9	0.246954
APMVVTSSTTGDLSIPSSELENIPSENQYFQSAIWSGFIK	4	34.7169	9.36546	8.08401	1.28145	31.5	4.0681
AVNPSDPLETTKPDMTL	2	26.006	4.63917	4.49545	0.143718	10.8	1.33072
AVNPSDPLETTKPDMTLK	3	22.8438	4.82468	4.91846	-0.0937738	11.7	-0.801485
AVNPSDPLETTKPDMTLKE	3	22.9856	4.34264	4.22487	0.117766	12.6	0.934651
AVNPSDPLETTKPDMTLKEA	2	23.2698	5.70292	5.83307	-0.130155	13.5	-0.964112
AVNPSDPLETTKPDMTLKEALK	3	23.6758	4.23136	4.2948	-0.063439	15.3	-0.414634
AVNPSDPLETTKPDMTLKEALKIAF	4	30.2801	3.29782	3.39017	-0.0923513	18	-0.513063
AVTKENTIINPSENGDTSTNGIKKIL	3	22.7571	7.229	7.60987	-0.380873	20.7	-1.83997
AVTKENTIINPSENGDTSTNGIKKILIF	4	26.8695	6.49311	6.47463	0.0184856	22.5	0.0821583
AVTKENTIINPSENGDTSTNGIKKILIFSKKGYEIG	5	25.5615	10.8703	10.6679	0.202449	29.7	0.681648
DDFSSTPITMNYN	2	27.4213	4.53273	4.71172	-0.179	9	-1.98888
DDFSSTPITMNYNQFLELEKTKQLRL	4	29.9842	6.49563	6.46334	0.0322909	20.7	0.155995
DDFSSTPITMNYNQFLELEKTKQLRLDTDQVYGNIATYNFENGRVR	6	30.2488	12.912	12.6346	0.277403	38.7	0.716804
DFNFDQQTSQNIKNQLAEL	2	31.9862	4.87648	2.88191	1.99458	15.3	13.0364
DITEFDFNFDQQTSQNIKNQLAEL	3	34.9211	6.79161	4.15668	2.63494	19.8	13.3078
DKRFHYDRNNIAVGADESVVKEAHREVINSSTEGLLLNIDKDIRKILSGYIVE	6	35.7525	11.1548	11.0814	0.0733489	45.9	0.159801
DRYDMLNISSLRQD	3	26.4339	6.37722	6.28668	0.0905414	10.8	0.838347
DRYDMLNISSLRQDGKTF	4	26.9191	6.47251	6.95583	-0.483318	14.4	-3.35637
DRYDMLNISSLRQDGKTFID	3	27.9926	6.21666	6.49595	-0.279289	16.2	-1.72401
DRYDMLNISSLRQDGKTFIDFKKYNDK	6	27.287	7.66253	8.22164	-0.559109	22.5	-2.48493
DRYDMLNISSLRQDGKTFIDFKKYNDKLPLYISNPNYKVN	6	29.149	11.6925	11.8199	-0.127305	32.4	-0.392918
EAHREVINSSTEGLLLNIDKDIRK	5	26.0681	7.76772	7.92295	-0.15523	19.8	-0.783992
EAHREVINSSTEGLLLNIDKDIRKIL	5	32.9489	6.19893	6.60122	-0.40229	21.6	-1.86245
EKTKQLRLDTDQVYGNIATYNFENGRVR	4	24.7708	10.2738	9.83884	0.435001	23.4	1.85898
ENTIINPSENGDTSTNGIKKIL	3	23.9267	6.58436	6.74095	-0.156591	17.1	-0.915737
EVINSSTEGLLLNIDKDIRK	4	28.3282	5.51244	5.49812	0.0143145	16.2	0.088361
FGFNEPNGNLQYQGK	2	24.7472	3.54369	3.32687	0.216818	10.8	2.00758
FKKYNDKLPLYISNPNYKVNVYAVTKENTIINPSENGDTSTNGIKKIL	6	26.3499	11.2835	11.9002	-0.616708	38.7	-1.59356
FLSPWISNIH	2	29.2662	2.41375	2.00438	0.409371	6.3	6.49795
FLSPWISNIHEK	3	26.0858	2.25299	2.06024	0.192754	8.1	2.37968
FLSPWISNIHEKK	3	24.0559	2.36669	2.57398	-0.207289	9	-2.30321
FLSPWISNIHEKKG	4	23.8815	4.89904	5.44538	-0.546342	9.9	-5.51861
FLSPWISNIHEKKGLTKYKSSPEKWSTASDPYSDFEK	6	24.6976	2.96666	4.48775	-1.52109	28.8	-5.28155
FQSAIWSGFIK	2	30.2417	0.0737641	0.201473	-0.127709	8.1	-1.57665
GDTSTNGIKKIL	3	20.2227	3.2853	3.24567	0.0396244	9	0.440271
GFNEPNGNLQYQGK	2	20.9981	4.35844	4.18991	0.168533	9.9	1.70236
GFNEPNGNLQYQGKDITEFDFNFDQQTSQNIKNQLAEL	4	33.1353	7.53111	5.07534	2.45576	31.5	7.79607
GFNEPNGNLQYQGKDITEFDFNFDQQTSQNIKNQLAELNATNIYTVLDKIKLN	5	35.4854	16.9665	9.12767	7.83886	45	17.4197
GKDITEFDFNFDQQTSQNIKNQLAEL	3	32.348	5.41389	3.60843	1.80546	21.6	8.35863
GLKEVINDRYDMLNISSLRQDGKTFIDFKKYNDK	6	28.4331	13.028	14.3449	-1.31689	28.8	-4.57254
GLKEVINDRYDMLNISSLRQDGKTFIDFKKYNDKLPLYISNPNYKVN	6	29.8736	16.2137	16.7836	-0.569916	38.7	-1.47265
GLLLNIDKDIR	3	25.6558	2.026	2.00368	0.0223172	8.1	0.275521
GLLLNIDKDIRK	3	23.6003	2.82003	2.73268	0.0873544	9	0.970605
GLLLNIDKDIRKIL	3	31.3872	3.55312	3.4435	0.109619	10.8	1.01499
GLNTADTARL	2	20.5273	1.97708	1.9812	-0.00412595	7.2	-0.0573048
GLNTADTARLNANIR	3	20.0406	2.21836	2.02537	0.19299	11.7	1.64949
GLNTADTARLNANIRYVNTGTAPIYNVLPTTSLVLGKNQTLATIK	5	28.7659	7.01674	6.55785	0.458892	36.9	1.24361
GLTKYKSSPEKWSTASDPYSDFEK	3	22.4707	1.31173	1.23146	0.0802758	18	0.445976
GLTKYKSSPEKWSTASDPYSDFEKVTGR	5	24.5711	3.54401	3.53466	0.00935074	21.6	0.0432905
GLTKYKSSPEKWSTASDPYSDFEKVTGRID	4	25.573	3.15314	3.2144	-0.0612629	23.4	-0.261807
GLTKYKSSPEKWSTASDPYSDFEKVTGRIDKNVSPEAR	6	25.2741	6.93138	7.19577	-0.264392	29.7	-0.89021
GLTKYKSSPEKWSTASDPYSDFEKVTGRIDKNVSPEARHPL	6	25.4107	3.80495	3.83891	-0.0339581	31.5	-0.107803
GLTKYKSSPEKWSTASDPYSDFEKVTGRIDKNVSPEARHPLVAAYPIVHVD	6	26.7888	6.62113	6.54662	0.0745083	39.6	0.188152
GNIATYNFENGRVR	3	21.8178	5.55693	5.61495	-0.0580149	10.8	-0.537175
GNIATYNFENGRVRVD	3	23.8199	7.30874	7.08596	0.222781	12.6	1.7681
IAAVNPSDPLETTKPDMTL	2	26.5855	5.0994	5.53892	-0.439519	12.6	-3.48825
IAAVNPSDPLETTKPDMTLK	3	23.4956	5.40945	5.23794	0.17151	13.5	1.27044
IAAVNPSDPLETTKPDMTLKE	3	23.7673	5.46093	5.44849	0.0124433	14.4	0.0864116
IAAVNPSDPLETTKPDMTLKEA	3	23.7611	5.46951	5.59387	-0.124363	15.3	-0.81283
IAAVNPSDPLETTKPDMTLKEALK	4	24.4228	6.58327	6.6562	-0.0729225	17.1	-0.426447
IAFGFNEPNGNLQYQGKDITEFDFNFDQQTSQNIKNQLAELNATNIYTVLDKIKLNAKMN	6	35.5586	14.351	10.7937	3.55733	51.3	6.93437
IATYNFENGRVR	3	21.2967	5.21501	5.21701	-0.00200146	9	-0.0222385
IATYNFENGRVRVD	3	23.2636	6.37889	6.28487	0.0940115	10.8	0.870477
IAVGADESVVKE	2	19.6733	2.8122	3.16772	-0.355515	9	-3.95017
IAVGADESVVKEAHREVIN	3	21.1683	3.836	3.81329	0.0227114	15.3	0.14844
IAVGADESVVKEAHREVINSSTE	3	22.299	6.17183	6.37901	-0.20718	18.9	-1.09619
IAVGADESVVKEAHREVINSSTEGLLLNIDKDIRK	5	27.9855	9.24478	9.30972	-0.0649439	29.7	-0.218666
IAVGADESVVKEAHREVINSSTEGLLLNIDKDIRKILSGYIVE	5	36.817	9.98938	9.88948	0.0998977	36.9	0.270725
IDKNVSPEARHPLVAAYPIVHVD	4	21.7697	1.39336	1.34247	0.0508855	16.2	0.314108
IEDTEGLKEVINDRYDMLNISSLRQDGKTF	5	29.2009	11.9503	13.2041	-1.25376	25.2	-4.97524
IEDTEGLKEVINDRYDMLNISSLRQDGKTFID	4	29.8332	12.3445	13.3659	-1.02146	27	-3.7832
IEDTEGLKEVINDRYDMLNISSLRQDGKTFIDFKKYNDK	6	29.1938	12.1087	13.5438	-1.43506	33.3	-4.30948
IEDTEGLKEVINDRYDMLNISSLRQDGKTFIDFKKYNDKLPLYISNPNYKVN	6	30.3113	17.4588	18.2978	-0.838955	43.2	-1.94203
IIFNGKDLNLVER	3	25.1652	2.55313	2.55632	-0.00318714	9.9	-0.0321933
IIFNGKDLNLVERR	4	23.8128	2.23441	2.26603	-0.0316172	10.8	-0.292752
IIFNGKDLNLVERRIA	4	25.729	2.14937	2.23212	-0.082743	12.6	-0.656691
IIFNGKDLNLVERRIAAVNPSDPLETTKPDMTLKEALK	6	28.6458	8.90445	9.14246	-0.238007	29.7	-0.801371
IILSKNEDQSTQNTDSETRTISKNTSTSRTHTSEVHGN	6	16.0765	8.29711	7.78551	0.511603	32.4	1.57902
ILIRDKRFHYDRNN	4	17.2644	0.637599	0.619412	0.0181866	10.8	0.168394
IQYQRENPTEKGLDFK	3	20.2085	3.9533	4.03232	-0.0790155	11.7	-0.675347
IQYQRENPTEKGLDFKL	3	24.1351	3.78539	3.39595	0.389441	12.6	3.09081
IQYQRENPTEKGLDFKLY	4	25.0133	2.33606	2.15559	0.180469	13.5	1.33681
IQYQRENPTEKGLDFKLYWTDSQNKKEVISSDNLQLPELKQKSSNSR	6	25.8001	8.25428	7.97791	0.276375	38.7	0.714148
IQYQRENPTEKGLDFKLYWTDSQNKKEVISSDNLQLPELKQKSSNSRKKR	6	24.6189	8.70891	8.15336	0.555553	41.4	1.34192
IRYVNTGTAPIYNVLPTTSLVLGK	3	28.3927	4.60071	4.46601	0.134696	18	0.748311
IRYVNTGTAPIYNVLPTTSLVLGKN	3	28.2436	3.11776	2.45146	0.666309	18.9	3.52544
IRYVNTGTAPIYNVLPTTSLVLGKNQ	3	28.0165	3.96313	3.75176	0.211371	19.8	1.06753
ISNPNYKVNVY	2	21.8558	0.903834	0.889305	0.0145281	7.2	0.201779
ISSLRQDGKTFIDFKKYNDK	5	21.7466	4.47092	4.57638	-0.105462	16.2	-0.651
ITEFDFNFDQQTSQNIKNQLAEL	3	33.518	6.54705	4.11274	2.43432	18.9	12.88
KENTIINPSENGDTSTNGIKKIL	4	22.2919	7.36722	8.20603	-0.838801	18	-4.66001
KNVSPEARHPLVAAYPIVHVD	3	21.2661	1.0334	1.05051	-0.0171096	14.4	-0.118816
LELEKTKQLRL	3	21.1963	0.21882	0.242595	-0.0237757	8.1	-0.293527
LKEVINDRYDMLNISSLRQDGKTFIDFKKYNDK	6	27.2018	8.94553	9.32671	-0.381179	27.9	-1.36623
LKIAFGFNEPNGNLQYQGK	3	26.4171	4.21833	4.4617	-0.243373	14.4	-1.69009
LKIAFGFNEPNGNLQYQGKDITEFDFNFDQQTSQNIKNQLAELNATNIYTVLDKIKLN	6	35.769	14.3481	9.3608	4.98727	49.5	10.0753
LPLYISNPNYKVN	2	24.9332	3.66091	3.66981	-0.00890381	8.1	-0.109924
LPLYISNPNYKVNVY	2	27.5176	3.83929	3.65349	0.185795	9.9	1.87672
LTKYKSSPEKWSTASDPYSDFEKVTGRID	5	25.4249	10.3698	11.292	-0.922169	22.5	-4.09853
LVAAYPIVHVD	2	24.512	0.276073	0.51566	-0.239586	7.2	-3.32759
LYWTDSQNK	2	22.8554	1.98983	1.77745	0.212378	6.3	3.37108
LYWTDSQNKKEVISSDNLQLPELKQKSSNSRKKR	6	22.0888	5.91794	5.99885	-0.0809142	27.9	-0.290015
NAQDDFSSTPITMNYNQF	2	30.4281	7.04086	7.05561	-0.0147522	13.5	-0.109276
NATNIYTVLDK	2	25.0066	3.81226	2.42638	1.38588	8.1	17.1096
NATNIYTVLDKIKLN	3	29.118	3.31995	2.36815	0.951803	11.7	8.13507
NATNIYTVLDKIKLNAKMN	4	28.314	3.88178	2.48234	1.39944	15.3	9.14665
NATNIYTVLDKIKLNAKMNIL	4	31.0726	3.71913	2.41788	1.30125	17.1	7.60966
NATNIYTVLDKIKLNAKMNILIR	5	30.0389	3.26902	2.24721	1.02181	18.9	5.40638
NDKLPLYISNPNYKVN	3	23.9166	4.34896	4.31795	0.0310019	10.8	0.287054
NFDQQTSQNIKNQLAEL	2	29.5783	4.25005	2.44533	1.80472	13.5	13.3683
NFQAPMVVTSSTTGDLSIPSSELENIPSENQYFQSAIWSGFIK	4	34.973	8.21176	9.26025	-1.04849	34.2	-3.06577
NIATYNFENGRVR	3	21.877	2.55954	2.74803	-0.188499	9.9	-1.90403
NIAVGADESVVK	2	19.736	2.30273	2.58977	-0.287036	9	-3.18929
NIRYVNTGTAPIYNVLPTTSLVLGK	3	28.3883	3.11776	2.11484	1.00293	18.9	5.30649
NISSLRQDGKTFIDFKKYNDK	5	22.9723	5.0525	5.3938	-0.341304	17.1	-1.99593
NKRTFLSPWISNIHEK	4	24.2792	2.52344	2.5248	-0.00135585	11.7	-0.0115885
NKRTFLSPWISNIHEKK	4	22.5992	2.78922	2.61077	0.178449	12.6	1.41626
NKRTFLSPWISNIHEKKG	5	22.2444	4.05722	3.86857	0.188654	13.5	1.39744
NKRTFLSPWISNIHEKKGLTKYKSSPEK	6	20.9603	4.78011	4.47137	0.308737	21.6	1.42934
NKRTFLSPWISNIHEKKGLTKYKSSPEKWSTASDPYSDFEK	6	24.3135	5.91401	6.1758	-0.261796	32.4	-0.808011
NKRTFLSPWISNIHEKKGLTKYKSSPEKWSTASDPYSDFEKVTGR	6	25.507	3.99449	3.35404	0.640445	36	1.77902
NKRTFLSPWISNIHEKKGLTKYKSSPEKWSTASDPYSDFEKVTGRID	6	26.1757	4.02217	4.47771	-0.455544	37.8	-1.20514
NRLLNESESSSQGLLGYYFSDLNFQ	3	34.1809	5.72524	5.74254	-0.0172962	20.7	-0.0835567
NTADTARLNANIRYVNTGTAPIYNVLPTTSLVLGKNQTLATIK	5	28.3607	6.55865	6.33069	0.227959	35.1	0.649457
NTIINPSENGDTSTNGIKKIL	3	23.6214	6.15247	6.08526	0.0672141	16.2	0.414902
NVLPTTSLVLGKNQTLATIK	3	25.0913	4.20974	4.3509	-0.141156	15.3	-0.922588
PLVAAYPIVHVD	2	25.7148	0.547615	0.466864	0.0807512	7.2	1.12154
PTTSLVLGKNQTLATIK	3	22.1186	4.01983	3.85779	0.162039	12.6	1.28602
QEVINKASNSNKIR	4	2.09614	7.52538	7.73621	-0.210825	10.8	-1.95209
QEVINKASNSNKIRLEKGRLYQIK	4	18.6294	4.42736	4.13519	0.292173	19.8	1.47562
QEVINKASNSNKIRLEKGRLYQIKIQ	6	20.6143	3.69827	3.59752	0.100745	21.6	0.466411
QLRLDTDQVYGNIATYNFENGRVR	4	26.8975	6.02636	6.10474	-0.0783803	19.8	-0.39586
QRENPTEKGLDFKLY	4	24.1002	2.09852	1.87052	0.228003	10.8	2.11113
QSAIWSGFIK	2	28.7982	-0.0843421	-0.0583902	-0.0259519	7.2	-0.360444
QYFQSAIWSGFIK	2	31.7262	0.699437	0.613501	0.085936	9.9	0.86804
REVINSSTEGLLLNIDKDIRK	5	26.9046	5.65	5.646	0.003999	17.1	0.0233859
REVINSSTEGLLLNIDKDIRKIL	4	33.6808	7.68187	7.52391	0.15796	18.9	0.835766
RIAAVNPSDPLETTKPDMTLKEALK	4	23.46	4.8743	5.06462	-0.190319	18	-1.05733
RLDTDQVYGNIATYNFENGRVR	4	25.4314	9.28924	9.20102	0.0882183	18	0.490102
RLDTDQVYGNIATYNFENGRVRVD	4	26.4433	6.942	6.93066	0.0113384	19.8	0.0572644
SENGDTSTNGIKKIL	3	20.9284	7.15062	7.55288	-0.402265	11.7	-3.43816
SESSSQGLLGYYFSDLNFQ	2	35.6363	2.29956	2.97876	-0.679199	15.3	-4.43921
SEVLPQIQETTAR	3	22.0073	1.2371	1.32076	-0.0836588	9	-0.929543
SEVLPQIQETTARIIFN	2	30.5865	1.96475	2.06746	-0.102709	12.6	-0.815149
SEVLPQIQETTARIIFNGK	3	29.451	1.69906	1.73341	-0.0343459	14.4	-0.238513
SEVLPQIQETTARIIFNGKDLNL	3	31.643	3.339	3.34697	-0.00796535	18	-0.0442519
SEVLPQIQETTARIIFNGKDLNLVER	4	30.0985	3.9416	4.12436	-0.182762	20.7	-0.882908
SLAGERTW	2	22.1275	2.83686	2.77146	0.0653951	5.4	1.21102
SLRQDGKTFIDFKKYNDK	5	20.8775	4.96558	4.88967	0.0759108	14.4	0.527158
SLSLAGERTW	2	25.4837	3.24747	2.92394	0.323529	7.2	4.49345
SLSLAGERTWAETMGL	2	31.7404	5.93146	6.31741	-0.385953	12.6	-3.06312
SQILAPNNYYPSK	2	22.8509	5.25975	5.46603	-0.206285	8.1	-2.54673
SQILAPNNYYPSKNLAPIAL	2	28.3025	5.42701	4.80978	0.617229	13.5	4.57207
SQILAPNNYYPSKNLAPIALNAQDD	3	27.0156	7.84249	8.0939	-0.251405	18	-1.3967
SQNKKEVISSDNLQLPELKQKSSNSR	5	20.2298	5.46424	5.31507	0.149174	20.7	0.720649
SSPEKWSTASDPYSDFEK	3	24.2837	1.43634	1.69608	-0.259743	12.6	-2.06145
SSPEKWSTASDPYSDFEKVTGRID	4	27.4491	2.83137	3.08396	-0.252596	18	-1.40331
SSTEGLLLNIDK	2	25.9849	4.4258	4.39423	0.031564	9	0.350711
SSTEGLLLNIDKD	2	26.41	3.65054	3.83282	-0.18228	9.9	-1.84121
SSTEGLLLNIDKDIR	3	27.512	3.60191	3.46012	0.141795	11.7	1.21192
SSTEGLLLNIDKDIRK	3	25.8754	4.51088	4.29968	0.211199	12.6	1.67618
SSTEGLLLNIDKDIRKIL	3	33.598	3.55437	3.27641	0.27796	14.4	1.93028
SSTEGLLLNIDKDIRKILSGYIVE	3	37.6669	7.43489	7.51672	-0.0818357	19.8	-0.413312
STSAGPTVPDRDNDGIPDSLEVEGYTVDVK	3	26.7041	5.19729	4.79912	0.398177	22.5	1.76967
STSAGPTVPDRDNDGIPDSLEVEGYTVDVKNKRT	5	24.3064	5.40939	4.92868	0.480712	26.1	1.84181
STSAGPTVPDRDNDGIPDSLEVEGYTVDVKNKRTFLSPWISNIHEKK	6	27.3545	6.77885	5.40702	1.37183	36.9	3.71769
STSAGPTVPDRDNDGIPDSLEVEGYTVDVKNKRTFLSPWISNIHEKKGLTK	6	26.9541	7.86842	6.56494	1.30348	40.5	3.21846
TDQVYGNIATYNFENGRVR	3	24.9843	7.67905	7.8124	-0.13335	15.3	-0.871569
TEGLKEVINDRYD	3	22.4636	4.17877	4.50964	-0.330875	9.9	-3.34217
TEGLKEVINDRYDMLNISSLRQDGKTFID	5	29.0458	9.27304	10.2228	-0.949707	24.3	-3.90826
TEGLKEVINDRYDMLNISSLRQDGKTFIDFKKYNDK	6	28.4402	14.0872	15.3451	-1.25794	30.6	-4.11091
TFLSPWISNIHEKK	3	26.0362	2.74464	2.74723	-0.00259304	9.9	-0.0261923
TFLSPWISNIHEKKGLTK	4	24.876	5.03813	5.12507	-0.0869385	13.5	-0.643989
TGSNWSEVLPQIQETTAR	2	28.0236	2.35376	2.7119	-0.35814	13.5	-2.65289
TGSNWSEVLPQIQETTARIIFNGKDLNL	3	35.1225	6.22819	6.59985	-0.371658	22.5	-1.65181
TIINPSENGDTSTNGIKKIL	3	23.486	5.39668	5.41107	-0.0143942	15.3	-0.0940795
TIINPSENGDTSTNGIKKILIF	3	28.2981	4.86286	4.93583	-0.0729716	17.1	-0.426734
TIINPSENGDTSTNGIKKILIFSKKGYEIG	5	26.4056	7.27328	6.99601	0.27727	24.3	1.14103
TTARIIFNGK	3	18.2763	0.833865	0.767281	0.066584	7.2	0.924777
TTARIIFNGKDLNLVERRIAAVNPSDPLETTKPDMTLKEALK	6	28.1952	9.74828	9.78842	-0.0401333	33.3	-0.12052
TYNFENGRVRVD	3	21.7764	5.55301	5.24359	0.309413	9	3.43792
VAAYPIVHVD	2	22.9153	0.484193	0.507767	-0.0235739	6.3	-0.374189
VAAYPIVHVDM	2	25.9058	0.45553	0.588132	-0.132601	7.2	-1.84169
VDDQEVINKASNSNKIRLEKGRLYQIK	5	21.4573	6.52792	6.25804	0.269881	22.5	1.19947
VDTGSNWSEVLPQIQETTAR	2	28.5133	4.31575	4.37473	-0.0589757	15.3	-0.385462
VDTGSNWSEVLPQIQETTARIIFNGKDLNL	3	35.8057	4.47163	4.85775	-0.386117	24.3	-1.58896
VINSSTEGLLLNIDKDIR	3	28.8944	4.74333	4.31742	0.425914	14.4	2.95773
VINSSTEGLLLNIDKDIRK	3	27.3899	2.06226	2.29234	-0.230085	15.3	-1.50382
VINSSTEGLLLNIDKDIRKIL	4	34.7027	5.32407	5.40589	-0.0818208	17.1	-0.478484
VKKSDEYTFATSADNHVTMWVDDQEVINKASNSNKIRLEKGRLYQIK	6	26.8836	8.89929	9.05163	-0.152335	40.5	-0.376135
VKNKRTFLSPWISNIHEK	5	22.9428	2.79574	2.61567	0.180071	13.5	1.33386
VKNKRTFLSPWISNIHEKK	6	21.3964	2.82303	2.6876	0.135434	14.4	0.940517
VKNKRTFLSPWISNIHEKKGLTK	6	21.1848	4.77815	4.95502	-0.176874	18	-0.982632
VNPSDPLETTKPDMTL	2	25.8293	6.67863	7.07811	-0.399478	9.9	-4.03513
VNPSDPLETTKPDMTLKE	3	22.9268	4.36663	4.66396	-0.297336	11.7	-2.54133
VNPSDPLETTKPDMTLKEA	3	23.277	4.34264	4.22482	0.117813	12.6	0.935023
VNPSDPLETTKPDMTLKEALK	4	23.698	3.75551	3.51516	0.240351	14.4	1.6691
VTKENTIINPSENGDTSTNGIKKIL	3	22.7245	7.3129	7.12637	0.186533	19.8	0.942086
VTKENTIINPSENGDTSTNGIKKILIF	4	26.865	6.33581	6.46734	-0.131529	21.6	-0.608929
VTKENTIINPSENGDTSTNGIKKILIFSKKGYEIG	5	25.6084	10.2497	10.593	-0.343219	28.8	-1.19173
VVTSSTTGDLSIPSSELENIPSENQYFQSAIWSGFIK	3	34.5191	5.71352	5.55753	0.155989	29.7	0.525217
VYAVTKENTIINPSENGDTSTNGIKK	4	19.7068	7.5975	8.36173	-0.764234	20.7	-3.69195
VYAVTKENTIINPSENGDTSTNGIKKIL	4	23.8453	7.05495	7.43692	-0.381974	22.5	-1.69766
VYAVTKENTIINPSENGDTSTNGIKKILIF	4	27.4277	6.8352	6.99482	-0.159623	24.3	-0.656885
VYAVTKENTIINPSENGDTSTNGIKKILIFSKKGYEIG	5	26.0176	10.0791	10.5136	-0.434468	31.5	-1.37926
VYGNIATYNFENGRVR	3	23.9798	6.73249	6.82535	-0.0928661	12.6	-0.737033
WSTASDPYSDFEKVTGRID	3	28.4659	2.03737	2.03291	0.00446038	14.4	0.0309748
WTDSQNKKEVISSDNLQLPELKQKSSNSRKKR	5	19.6045	4.42228	4.12219	0.300092	26.1	1.14978
WVDDQEVINKASNSNKIRLEKGRLYQIK	6	23.0745	8.76016	8.56986	0.190301	23.4	0.813251
YISNPNYKVN	2	18.5492	1.98227	1.79374	0.188522	6.3	2.99242
YISNPNYKVNVY	2	23.2858	1.49666	1.51543	-0.0187753	8.1	-0.231793
YKSSPEKWSTASDPYSDFEK	3	23.2953	1.08587	1.03825	0.0476212	14.4	0.330703
YKSSPEKWSTASDPYSDFEKVTGRID	4	26.3916	2.60784	2.70247	-0.0946305	19.8	-0.477932
YKSSPEKWSTASDPYSDFEKVTGRIDKNVSPEARHPL	6	25.9008	5.46651	5.09857	0.367932	27.9	1.31875
YKSSPEKWSTASDPYSDFEKVTGRIDKNVSPEARHPLVAAYPIVHVD	6	27.1422	4.80781	4.34814	0.459667	36	1.27685
YQRENPTEKGLDFKLY	4	24.4317	3.02483	3.0311	-0.00627105	11.7	-0.0535987
YTVDVKNKRTFLSPWISNIHEKK	5	23.4011	4.39154	4.53459	-0.143053	18	-0.79474
YVNTGTAPIYNVLPTTSLVLGK	2	29.826	2.80833	2.95249	-0.144163	16.2	-0.889894
YVNTGTAPIYNVLPTTSLVLGKNQTL	3	30.3894	4.3985	4.3674	0.0310979	19.8	0.15706
YVNTGTAPIYNVLPTTSLVLGKNQTLATIK	3	29.1083	5.64244	5.41232	0.230116	23.4	0.983402
YWTDSQNKKEVISSDNLQLPELKQKSSNSRKKR	6	21.091	0.511099	0.393067	0.118032	27	0.437155

## Sheet: p1C03
Peptide sequence	Charge	Retention time (min)	Average Deuterium Uptake (-p1C03) (Da)	Average deuterium uptake (+p1C03) (Da)	Deuterium Uptake Difference (PA - PA:p1C03) (Da)	Max_Deuterium (Da)	Fractional_D_Uptake_Difference(%)
AGPTVPDRDNDGIPDSLEVEGYTVDVK	3	26.367	7.55195	7.07596	0.475988	19.58	2.43099
AHREVINSSTEGLLLNIDKDIRKIL	5	32.5502	7.36095	7.46082	-0.0998745	20.47	-0.487907
AKENQLSQILAPNNYYPSKNLAPIAL	3	28.9757	10.042	9.91534	0.126673	18.69	0.677756
ANIRYVNTGTAPIYNVLPTTSLVLGKNQTLATIK	4	27.2481	6.81128	6.51714	0.294136	26.7	1.10163
ATNIYTVLDK	2	24.4449	3.57244	3.8379	-0.265458	7.12	-3.72834
AVNPSDPLETTKPDM	2	22.6551	5.46871	5.35264	0.11607	8.9	1.30415
AVNPSDPLETTKPDMTL	2	25.4036	6.19026	6.13334	0.0569219	10.68	0.532976
AVNPSDPLETTKPDMTLK	3	22.4026	6.54172	6.68249	-0.140771	11.57	-1.21669
AVNPSDPLETTKPDMTLKE	3	22.4796	5.92099	5.9993	-0.0783089	12.46	-0.628483
AVNPSDPLETTKPDMTLKEA	2	22.7136	6.62886	6.60018	0.0286822	13.35	0.214848
AVNPSDPLETTKPDMTLKEALK	3	23.1688	5.83763	5.77927	0.0583564	15.13	0.3857
AVTKENTIINPSENGDTSTNGIKK	4	17.0694	11.3768	11.3362	0.0405965	18.69	0.21721
AVTKENTIINPSENGDTSTNGIKKIL	3	22.2553	10.9375	10.771	0.166572	20.47	0.813738
AVTKENTIINPSENGDTSTNGIKKILIF	4	26.3162	10.2215	10.2098	0.0117057	22.25	0.05261
DDFSSTPITMNY	2	28.5546	4.71323	4.61856	0.0946675	8.01	1.18187
DDFSSTPITMNYNQFLELEKTKQL	3	30.0774	8.73997	8.56561	0.174358	18.69	0.932893
DDFSSTPITMNYNQFLELEKTKQLRL	4	29.6464	7.43778	7.12613	0.311649	20.47	1.52247
DDFSSTPITMNYNQFLELEKTKQLRLDTDQVYGNIATYNFENGRVR	6	30.0994	20.1459	20.3782	-0.232342	38.27	-0.607112
DFNFDQQTSQNIKN	2	23.4446	4.90728	5.0073	-0.100023	10.68	-0.936547
DFNFDQQTSQNIKNQLAEL	2	32.0961	6.55036	6.56958	-0.0192174	15.13	-0.127015
DKIKLNAKMN	2	9.27119	0.223898	0.244184	-0.0202862	7.12	-0.284919
DMLNISSLRQDGKTFID	3	27.8572	6.1877	6.04284	0.144867	13.35	1.08515
DRYDMLNISSLRQDGKTF	4	26.5323	6.59682	6.83503	-0.238207	14.24	-1.6728
DRYDMLNISSLRQDGKTFID	4	27.6466	7.42448	7.38365	0.0408256	16.02	0.254841
DRYDMLNISSLRQDGKTFIDFKKYNDK	5	27.0379	13.1353	13.9133	-0.778055	22.25	-3.49688
DTARLNANIR	3	14.6273	0.715448	0.712708	0.00273951	7.12	0.0384763
DTDQVYGNIATYNFENGRVR	3	25.7893	11.5049	11.4439	0.0610404	16.02	0.381026
DTDQVYGNIATYNFENGRVRVD	3	26.7368	11.3636	11.2263	0.137231	17.8	0.770962
EAHREVINSSTEGLLLNIDKDIRK	5	25.7307	8.33657	7.90389	0.432674	19.58	2.20977
EAHREVINSSTEGLLLNIDKDIRKIL	5	32.8609	7.9168	7.85532	0.0614845	21.36	0.287849
EKTKQLRLDTDQVYGNIATYNFENGRVR	6	24.5872	10.8014	10.7812	0.0201619	23.14	0.0871303
EKTKQLRLDTDQVYGNIATYNFENGRVRVD	5	25.0273	11.9647	11.7649	0.199841	24.92	0.801929
ENTIINPSENGDTSTNGIKKIL	3	23.3834	9.34853	9.16086	0.187669	16.91	1.10981
FDQQTSQNIKN	2	8.95748	4.00422	4.01164	-0.00741953	8.01	-0.0926284
FEKVTGRID	3	16.7565	1.13799	1.09243	0.0455569	6.23	0.73125
FGFNEPNGNLQYQGK	2	24.2221	4.76214	4.80568	-0.043546	10.68	-0.407734
FKKYNDKLPLYISNPNYKVN	3	22.3745	6.82109	6.82215	-0.00106567	14.24	-0.00748362
FLSPWISNIH	2	28.8798	3.06005	3.033	0.0270501	6.23	0.43419
FLSPWISNIHEK	3	25.5859	3.38386	3.09228	0.291579	8.01	3.64018
FLSPWISNIHEKK	3	23.5848	1.34852	1.08905	0.259478	8.9	2.91548
FLSPWISNIHEKKGLTK	5	22.5873	4.93045	4.86284	0.067602	12.46	0.542552
FLSPWISNIHEKKGLTKYKSSPEKWSTASDPYSDFEKVTGRID	6	26.3532	8.85455	8.83371	0.0208408	33.82	0.0616227
FQSAIWSGFIK	2	29.8942	0.807741	0.785904	0.0218369	8.01	0.272621
FSSTPITMNYNQFLELEKTKQLRL	4	28.7133	4.79377	5.02591	-0.232146	18.69	-1.24209
GFNEPNGNLQYQGK	2	20.5757	3.89783	3.85422	0.043603	9.79	0.445383
GFNEPNGNLQYQGKDITEF	2	26.7391	5.21634	5.22746	-0.0111175	14.24	-0.0780725
GKNQTLATIK	2	17.298	4.07267	4.03155	0.0411171	7.12	0.577488
GLLLNIDKDIR	3	25.2163	2.9223	2.86753	0.0547652	8.01	0.683711
GLLLNIDKDIRK	3	23.1758	3.79721	3.94304	-0.145826	8.9	-1.6385
GLLLNIDKDIRKIL	3	31.2655	4.20742	4.16976	0.0376625	10.68	0.352645
GLNTADTARL	2	20.2207	2.95813	2.91512	0.0430094	7.12	0.604065
GLNTADTARLN	2	17.8046	3.0388	3.02163	0.0171668	8.01	0.214318
GLNTADTARLNANIR	3	19.6788	3.97193	4.03903	-0.067099	11.57	-0.579939
GLTKYKSSPEKWSTASDPYSDFEK	3	22.5077	2.05424	1.88635	0.167889	17.8	0.943199
GLTKYKSSPEKWSTASDPYSDFEKVTGR	5	24.3746	3.19356	3.68386	-0.490298	21.36	-2.2954
GLTKYKSSPEKWSTASDPYSDFEKVTGRID	5	25.2985	3.98523	3.88168	0.103552	23.14	0.447503
GLTKYKSSPEKWSTASDPYSDFEKVTGRIDKNVSPEARHPL	5	25.1417	6.95661	7.10179	-0.14518	31.15	-0.466067
GLTKYKSSPEKWSTASDPYSDFEKVTGRIDKNVSPEARHPLVAAYPIVHVD	6	26.2645	8.54103	8.12733	0.413708	39.16	1.05646
GNAEVHASF	2	19.5593	3.9189	3.94466	-0.0257666	6.23	-0.413588
GNIATYNFENGRVR	3	21.7696	6.03812	6.06322	-0.0251065	10.68	-0.235079
IAAVNPSDPLETTKPDM	2	23.4653	5.53388	5.4842	0.0496782	10.68	0.465152
IAAVNPSDPLETTKPDMTL	2	25.9997	7.17551	7.13754	0.0379711	12.46	0.304744
IAAVNPSDPLETTKPDMTLK	3	22.9612	6.32028	6.31192	0.00835849	13.35	0.0626104
IAAVNPSDPLETTKPDMTLKE	3	23.064	6.95781	7.10618	-0.148369	14.24	-1.04192
IAAVNPSDPLETTKPDMTLKEA	3	23.2015	7.08327	6.50943	0.573834	15.13	3.79269
IAAVNPSDPLETTKPDMTLKEALK	4	23.8297	6.92382	6.90102	0.0228057	16.91	0.134865
IATYNFENGR	2	21.9961	4.70053	4.63364	0.0668895	7.12	0.939459
IATYNFENGRVR	3	21.0644	5.88093	5.9026	-0.0216646	8.9	-0.243422
IATYNFENGRVRVD	3	23.2715	7.07679	7.1187	-0.041908	10.68	-0.392397
IAVGADESVVK	2	18.0541	2.98969	2.99519	-0.00549456	8.01	-0.0685963
IAVGADESVVKE	2	19.3095	2.88311	2.90408	-0.0209641	8.9	-0.235551
IAVGADESVVKEAH	3	18.1913	5.60265	5.616	-0.0133501	10.68	-0.125001
IAVGADESVVKEAHR	4	17.3944	4.74613	4.75844	-0.012304	11.57	-0.106344
IAVGADESVVKEAHRE	3	18.0193	5.70118	5.66896	0.0322168	12.46	0.258562
IAVGADESVVKEAHREVIN	3	20.5734	5.78976	5.74468	0.045085	15.13	0.297984
IAVGADESVVKEAHREVINSSTE	3	22.2296	8.13088	8.24916	-0.118285	18.69	-0.632878
IAVGADESVVKEAHREVINSSTEGLLLNIDKDIRK	6	27.6489	11.7682	11.6814	0.0867532	29.37	0.29538
IAVGADESVVKEAHREVINSSTEGLLLNIDKDIRKIL	5	33.1331	11.6912	11.6399	0.0512449	31.15	0.16451
IDFKKYNDK	3	16.6644	2.69398	2.6967	-0.00272358	6.23	-0.0437173
IDKNVSPEARHPL	4	12.3717	1.66055	1.54736	0.113192	8.01	1.41313
IDKNVSPEARHPLVAAYPIVHVD	4	21.5613	2.30783	2.45172	-0.14389	16.02	-0.89819
IEDTEGLKEVINDRYD	3	24.1869	6.48768	6.42944	0.0582373	12.46	0.467394
IEDTEGLKEVINDRYDML	3	28.4917	6.83171	6.77257	0.059142	14.24	0.415323
IEDTEGLKEVINDRYDMLNISSLRQDGKTFID	5	29.4307	12.9912	12.7625	0.228724	26.7	0.856643
IIFNGKDLNLVER	3	24.6807	5.33076	5.27035	0.0604093	9.79	0.617051
ILAPNNYYPSK	2	21.1789	2.45358	2.45749	-0.00390767	6.23	-0.0627234
ILIRDKRFHYDRNN	4	17.2074	1.41932	1.51424	-0.0949205	10.68	-0.888769
IPSENQYFQSAIWSGFIK	3	32.618	1.98937	1.26816	0.721204	13.35	5.40228
IQYQRENPTEK	2	8.85009	3.91918	1.18767	2.73151	7.12	38.3639
IQYQRENPTEKGL	3	18.6804	3.39942	1.18818	2.21124	8.9	24.8454
IQYQRENPTEKGLDFK	4	20.0801	4.05174	2.04534	2.0064	11.57	17.3414
IQYQRENPTEKGLDFKLY	3	24.5291	3.92687	1.89119	2.03568	13.35	15.2486
IQYQRENPTEKGLDFKLYWTDSQNKKEVISSDNLQLPELKQKSSNSR	6	25.3544	14.515	12.2905	2.22445	38.27	5.81251
IRYVNTGTAPIYNVLPTTSLVLGK	3	27.6955	5.69011	5.40228	0.28783	17.8	1.61702
IRYVNTGTAPIYNVLPTTSLVLGKN	3	27.3385	4.13484	3.99845	0.136395	18.69	0.729775
IRYVNTGTAPIYNVLPTTSLVLGKNQ	3	27.3081	4.66274	4.89392	-0.231172	19.58	-1.18066
IRYVNTGTAPIYNVLPTTSLVLGKNQTL	3	28.4565	5.50003	5.5332	-0.0331613	21.36	-0.155249
IRYVNTGTAPIYNVLPTTSLVLGKNQTLATIK	4	27.1947	7.33672	6.90311	0.433606	24.92	1.73999
IRYVNTGTAPIYNVLPTTSLVLGKNQTLATIKAKENQL	5	28.0451	10.2695	10.2029	0.0666024	30.26	0.2201
IRYVNTGTAPIYNVLPTTSLVLGKNQTLATIKAKENQLSQILAPNNYYPSKNLAPIAL	6	32.5083	18.8105	18.5256	0.284953	45.39	0.627787
ISNPNYKVN	2	14.9683	1.40639	1.40778	-0.00138915	5.34	-0.0260141
ISNPNYKVNVY	2	21.8352	1.20259	1.19025	0.0123459	7.12	0.173397
KENTIINPSENGDTSTNGIKKIL	4	21.9217	9.36414	9.49887	-0.13473	17.8	-0.756912
KEVISSDNLQLPELKQKSSNSRKKR	5	18.1983	7.15161	7.09449	0.0571191	19.58	0.291722
KNVSPEARHPLVAAYPIVHVD	3	20.8563	1.43347	1.38335	0.0501164	14.24	0.351941
KWSTASDPYSDFEK	3	23.5682	2.20534	2.48405	-0.278712	9.79	-2.84691
LELEKTKQL	2	18.0869	0.406233	0.447106	-0.0408736	6.23	-0.656077
LELEKTKQLR	3	10.6784	0.39565	0.365069	0.0305812	7.12	0.429511
LELEKTKQLRL	3	20.6462	0.572048	0.54381	0.0282382	8.01	0.352536
LELEKTKQLRLD	4	19.8143	3.88665	3.68779	0.198863	8.9	2.23441
LENIPSENQYFQSAIWSGFIK	3	33.0978	2.86673	2.05325	0.813473	16.02	5.07786
LKIAFGFNEPNGNLQYQGK	3	25.8101	3.25178	3.80303	-0.551254	14.24	-3.87117
LLNIDKDIRK	3	18.4015	3.30284	3.31006	-0.00722667	7.12	-0.101498
LLNIDKDIRKIL	4	26.3998	3.16865	3.14175	0.0269083	8.9	0.302341
LNIDKDIRKIL	3	24.6899	3.273	3.23576	0.0372378	8.01	0.464892
LPLYISNPNYKVN	2	24.4241	4.15137	4.14535	0.00601468	8.01	0.0750896
LPLYISNPNYKVNVY	2	27.1602	5.22954	5.28245	-0.0529152	9.79	-0.540503
LSIPSSELENIPSENQYFQSAIWSGFIK	3	33.9016	5.85492	4.58265	1.27227	21.36	5.95633
LSPWISNIHEKK	4	20.6087	3.91189	3.88189	0.0299987	8.01	0.374516
LVAAYPIVHVD	2	23.6595	0.861054	0.608884	0.25217	7.12	3.54171
LYWTDSQNK	2	22.7859	2.97794	2.87728	0.100659	6.23	1.61571
NATNIYTVLDK	2	24.5338	4.71474	4.73342	-0.0186751	8.01	-0.233147
NATNIYTVLDKIKLN	3	28.8706	4.04835	3.94965	0.0987034	11.57	0.853097
NATNIYTVLDKIKLNAKMN	4	27.9985	4.93144	4.9018	0.0296421	15.13	0.195916
NATNIYTVLDKIKLNAKMNIL	4	30.5327	4.58457	4.75085	-0.16628	16.91	-0.983323
NDKLPLYISNPNYKVN	3	23.5497	5.0794	5.15885	-0.0794479	10.68	-0.743894
NFDQQTSQNIK	2	17.1229	3.77473	3.79996	-0.0252331	8.01	-0.31502
NFDQQTSQNIKN	2	16.3998	4.18467	4.22841	-0.0437441	8.9	-0.491507
NFDQQTSQNIKNQ	2	17.6051	4.23641	4.26249	-0.0260753	9.79	-0.266346
NFDQQTSQNIKNQLAEL	2	29.4681	5.92852	5.80064	0.127881	13.35	0.957912
NFENGRVRVD	3	18.6499	4.81014	4.81521	-0.00506467	7.12	-0.0711331
NIATYNFENGRVR	3	21.814	4.65233	4.1795	0.472832	9.79	4.82974
NIAVGADESVVK	2	19.1052	3.1589	3.1543	0.00459596	8.9	0.05164
NIAVGADESVVKEAHREVIN	4	21.5918	6.65382	6.59925	0.0545724	16.02	0.340651
NKRTFLSPWISNIH	3	26.2904	4.22453	4.50127	-0.276742	9.79	-2.82678
NKRTFLSPWISNIHEK	4	24.0392	4.09726	3.76047	0.336789	11.57	2.91088
NKRTFLSPWISNIHEKK	4	22.2576	4.47916	4.31472	0.164443	12.46	1.31976
NKRTFLSPWISNIHEKKGLTK	6	21.7507	4.49061	3.92513	0.565475	16.02	3.52981
NKRTFLSPWISNIHEKKGLTKYKSSPEKWSTASDPYSDFEK	6	23.9714	8.38929	8.69848	-0.309192	32.04	-0.965018
NKRTFLSPWISNIHEKKGLTKYKSSPEKWSTASDPYSDFEKVTGR	6	25.1371	6.92772	6.9911	-0.0633835	35.6	-0.178044
NKRTFLSPWISNIHEKKGLTKYKSSPEKWSTASDPYSDFEKVTGRID	6	25.691	7.36552	7.00056	0.364959	37.38	0.976349
NNIAVGADESVVK	2	19.0376	3.98162	3.77239	0.209222	9.79	2.1371
NQLSQILAPNNYYPSKNLAPIAL	2	30.5657	9.33796	8.66675	0.671214	16.02	4.18985
NTADTARLNANIR	3	17.0365	2.39834	2.36962	0.0287201	9.79	0.293361
NTADTARLNANIRYVNTGTAPIYNVLPTTSLVLGKNQTLATIK	5	27.7374	8.97755	8.65368	0.323873	34.71	0.933082
NTIINPSENGDTSTNGIKK	3	17.3193	9.55322	8.78898	0.764248	14.24	5.36691
NTIINPSENGDTSTNGIKKIL	2	23.0801	9.22494	8.49447	0.730465	16.02	4.55971
NTIINPSENGDTSTNGIKKILIF	3	27.5439	6.84165	7.63152	-0.78987	17.8	-4.43747
NVLPTTSLVLGK	2	23.9876	2.49919	2.44677	0.0524277	8.01	0.654529
NVLPTTSLVLGKN	2	23.7364	3.27897	3.20824	0.0707291	8.9	0.794709
NVLPTTSLVLGKNQ	2	23.5377	3.72766	3.74386	-0.0162073	9.79	-0.16555
NVLPTTSLVLGKNQTL	2	25.672	4.07048	4.20593	-0.135457	11.57	-1.17076
NVLPTTSLVLGKNQTLATIK	3	24.4615	5.87262	5.80663	0.0659891	15.13	0.436147
PLVAAYPIVHVD	2	25.2001	0.613377	0.619609	-0.00623168	7.12	-0.0875236
PTEKGLDFKLY	3	25.1324	1.96534	0.937293	1.02805	7.12	14.4388
PTTSLVLGK	2	18.8727	1.40546	1.47991	-0.074453	5.34	-1.39425
PTTSLVLGKN	2	18.5163	2.19492	2.14323	0.0516862	6.23	0.829633
PTTSLVLGKNQ	2	18.4413	2.46081	2.57111	-0.110298	7.12	-1.54913
PTTSLVLGKNQTL	2	22.7951	3.75607	3.66523	0.0908382	8.9	1.02065
QEVINKASNSNKIRLEKGRLYQIK	5	18.4696	7.03135	6.92061	0.110735	19.58	0.565551
QLRLDTDQVYGNIATYNFENGRVR	4	26.5099	8.87002	8.8609	0.00911629	19.58	0.0465592
QLSQILAPNNYYPSKNLAPIAL	2	29.372	8.13456	8.08603	0.0485286	15.13	0.320744
QRENPTEKGLDFKLY	4	23.7341	3.72251	1.71605	2.00646	10.68	18.7871
QSAIWSGFIK	2	28.4172	0.0481281	0.350411	-0.302283	7.12	-4.24555
QVYGNIATYNFENGRVR	3	24.0064	3.34861	3.215	0.133606	13.35	1.00079
QYFQSAIWSGFIK	3	31.4348	0.0647378	0.0171997	0.047538	9.79	0.485578
REVINSSTEGLLLNIDKDIRKIL	4	33.4515	7.51025	7.45559	0.0546623	18.69	0.292468
RLDTDQVYGNIATYNFENGRVR	4	25.2726	9.71459	10.2534	-0.53883	17.8	-3.02714
RLDTDQVYGNIATYNFENGRVRVD	4	25.8733	10.9885	11.0383	-0.0497522	19.58	-0.254097
RNNIAVGADESVVK	3	17.2564	3.58322	3.40688	0.176342	10.68	1.65114
SEVLPQIQETTAR	2	21.5309	1.53023	1.50363	0.0265942	8.9	0.298812
SEVLPQIQETTARIIFN	2	30.1745	2.12098	2.0396	0.0813754	12.46	0.653093
SEVLPQIQETTARIIFNGK	3	28.8355	1.93488	1.95883	-0.0239415	14.24	-0.168129
SEVLPQIQETTARIIFNGKDL	3	30.5917	3.34542	3.69492	-0.349504	16.02	-2.18167
SEVLPQIQETTARIIFNGKDLNL	3	31.2937	4.11473	4.04421	0.0705177	17.8	0.396167
SKNEDQSTQNTDSETRTISKNTSTSRTHTSEVHGN	6	14.421	13.0294	12.7734	0.25598	29.37	0.871571
SLSLAGERTWAETMGL	2	31.4722	8.26632	8.1456	0.120717	12.46	0.968839
SPEKWSTASDPYSDFEK	3	24.0111	2.04647	1.60453	0.441933	11.57	3.81965
SPEKWSTASDPYSDFEKVTGRID	4	26.9962	3.60804	2.73245	0.875582	16.91	5.1779
SQILAPNNYYPSK	2	22.4819	5.54696	5.57197	-0.0250121	8.01	-0.31226
SQILAPNNYYPSKNLAPIAL	2	27.754	6.78586	6.78811	-0.00225846	13.35	-0.0169173
SQNKKEVISSDNLQLPELKQKSSNSRKKR	6	17.2495	6.55658	5.88995	0.666628	23.14	2.88085
SSPEKWSTASDPYSDFEK	3	24.018	2.5937	2.02385	0.569849	12.46	4.57343
SSPEKWSTASDPYSDFEKVTGRID	4	27.0264	3.8917	3.75598	0.135726	17.8	0.762505
SSTEGLLLNIDKD	2	25.7962	4.16506	4.1083	0.0567563	9.79	0.579737
SSTEGLLLNIDKDIR	3	27.2388	4.10713	4.13023	-0.0231023	11.57	-0.199674
SSTEGLLLNIDKDIRK	4	25.544	5.18629	5.24454	-0.0582489	12.46	-0.467487
SSTEGLLLNIDKDIRKIL	3	33.4469	4.61455	4.46486	0.149687	14.24	1.05117
SSTEGLLLNIDKDIRKILSGY	3	36.2109	7.16592	7.55834	-0.392425	16.91	-2.32067
SSTEGLLLNIDKDIRKILSGYIVEIEDTEGLKEVINDRYD	5	38.6082	12.9105	13.5208	-0.610316	33.82	-1.8046
STSAGPTVPDRDNDGIPDSLEVEGYTVDVK	4	26.4303	2.30513	1.64315	0.661984	22.25	2.97521
STSAGPTVPDRDNDGIPDSLEVEGYTVDVKNKRT	5	23.6687	5.30582	5.49267	-0.186847	25.81	-0.723931
STSAGPTVPDRDNDGIPDSLEVEGYTVDVKNKRTFLSPWISNIHEKK	6	27.0876	11.5583	11.3125	0.245756	36.49	0.673488
TDQVYGNIATYNFENGRVR	3	24.7765	8.90008	8.63926	0.260827	15.13	1.72391
TEGLKEVINDRYD	3	22.3349	5.48063	5.43859	0.0420365	9.79	0.429382
TFLSPWISNIH	2	30.6688	3.1153	3.10699	0.00831172	7.12	0.116738
TFLSPWISNIHEK	3	27.9296	3.71323	3.64369	0.0695436	8.9	0.781389
TFLSPWISNIHEKK	4	25.8595	3.81853	3.71327	0.105266	9.79	1.07524
TFLSPWISNIHEKKGLTK	5	24.6692	3.60369	3.43439	0.169297	13.35	1.26814
TFLSPWISNIHEKKGLTKYKSSPEKWSTASDPYSDFEK	6	25.5555	8.36265	8.52685	-0.164196	29.37	-0.55906
TFLSPWISNIHEKKGLTKYKSSPEKWSTASDPYSDFEKVTGRID	6	27.1579	9.1959	9.08869	0.107211	34.71	0.308875
TGSNWSEVLPQIQETTAR	3	27.586	4.07753	3.50137	0.576162	13.35	4.31582
TGSNWSEVLPQIQETTARIIFNGK	3	33.5239	4.37089	4.82743	-0.456544	18.69	-2.44272
TGSNWSEVLPQIQETTARIIFNGKDLNL	3	34.669	6.49342	6.54085	-0.0474263	22.25	-0.213152
TGSNWSEVLPQIQETTARIIFNGKDLNLVER	4	33.4819	5.80923	6.84967	-1.04044	24.92	-4.17514
TGSNWSEVLPQIQETTARIIFNGKDLNLVERRIA	5	33.3114	7.2315	7.51715	-0.285653	27.59	-1.03535
TGTAPIYNVLPTTSLVLGKNQTLATIK	3	27.6863	8.45272	7.90801	0.544707	20.47	2.661
TIINPSENGDTSTNGIKK	3	17.17	8.86283	8.79055	0.0722799	13.35	0.541423
TIINPSENGDTSTNGIKKIL	2	23.029	8.3565	8.04355	0.31295	15.13	2.06841
TIINPSENGDTSTNGIKKILIF	3	27.9634	7.69258	7.53387	0.15871	16.91	0.938556
TTARIIFNGK	3	17.9224	1.02628	0.972314	0.0539688	7.12	0.757989
TVLDKIKLNAKMN	4	21.7461	2.73101	2.63385	0.0971594	9.79	0.992435
TYNFENGRVR	3	19.3141	4.66008	4.72224	-0.0621661	7.12	-0.873119
VAAYPIVH	2	19.0021	0.39731	0.330885	0.0664249	4.45	1.49269
VAAYPIVHVD	2	21.8232	0.618115	0.546516	0.0715994	6.23	1.14927
VDDQEVINKASNSNKIR	3	18.1937	8.50725	8.46047	0.0467773	13.35	0.350392
VDDQEVINKASNSNKIRLEKGRLYQIK	5	21.0409	9.40902	9.3488	0.0602245	22.25	0.270672
VDTGSNWSEVLPQIQETTAR	3	28.0733	6.41677	6.11388	0.30289	15.13	2.00192
VDTGSNWSEVLPQIQETTARIIFNGK	3	34.091	4.92518	5.08936	-0.164185	20.47	-0.802074
VDTGSNWSEVLPQIQETTARIIFNGKDLNL	3	35.0478	6.15168	6.13373	0.0179592	24.03	0.0747367
VDTGSNWSEVLPQIQETTARIIFNGKDLNLVER	4	33.799	9.51541	8.67102	0.844397	26.7	3.16254
VDTGSNWSEVLPQIQETTARIIFNGKDLNLVERRIA	5	33.5872	8.684	8.41082	0.27318	29.37	0.930134
VEGYTVDVK	2	19.3976	2.56099	2.54866	0.0123301	6.23	0.197915
VERRIAAVNPSDPLETTKPDMTLKEA	5	21.7765	8.8294	8.78028	0.0491168	18.69	0.262797
VERRIAAVNPSDPLETTKPDMTLKEALK	5	22.4422	7.57757	7.53837	0.0391971	20.47	0.191485
VINSSTEGLLLNIDKDIRK	4	27.0217	5.67925	6.10176	-0.422507	15.13	-2.79251
VINSSTEGLLLNIDKDIRKIL	4	34.3596	6.28021	6.32058	-0.0403729	16.91	-0.238752
VINSSTEGLLLNIDKDIRKILSGYIVE	3	37.6294	7.63092	7.56323	0.0676904	22.25	0.304227
VKKSDEYTFATSADNHVTM	3	21.9587	4.04333	4.1062	-0.0628702	15.13	-0.415533
VKNKRTFLSPWISNIHEK	5	22.6924	4.56795	4.63021	-0.0622584	13.35	-0.466355
VKNKRTFLSPWISNIHEKK	4	20.9287	3.17901	3.12291	0.0560947	14.24	0.393923
VKNKRTFLSPWISNIHEKKGLTK	5	20.8027	6.24359	6.12368	0.119908	17.8	0.673638
VKNKRTFLSPWISNIHEKKGLTKYKSSPEKWSTASDPYSDFEK	5	23.5331	6.5422	6.73029	-0.188087	33.82	-0.55614
VKNKRTFLSPWISNIHEKKGLTKYKSSPEKWSTASDPYSDFEKVTGR	6	24.7273	8.11189	7.91468	0.197203	37.38	0.527564
VKNKRTFLSPWISNIHEKKGLTKYKSSPEKWSTASDPYSDFEKVTGRID	6	25.3707	7.42062	7.26515	0.155468	39.16	0.397008
VLGKNQTLATIK	3	17.3805	4.54594	4.51929	0.0266486	8.9	0.299422
VLGKNQTLATIKAKEN	4	17.0671	7.33199	7.14933	0.182655	12.46	1.46593
VLGKNQTLATIKAKENQL	3	21.5964	8.11444	8.0333	0.0811343	14.24	0.569763
VLPQIQETTAR	2	19.7466	0.755056	0.809854	-0.0547984	7.12	-0.76964
VNPSDPLETTKPDMTL	2	25.3031	4.91395	4.92287	-0.00891725	9.79	-0.0910853
VNPSDPLETTKPDMTLKEA	3	22.6785	5.92099	6.00278	-0.0817961	12.46	-0.656469
VNPSDPLETTKPDMTLKEALK	3	23.185	4.08511	3.86769	0.217419	14.24	1.52682
VTGRIDKNVSPEARHPL	4	15.2055	5.36669	5.0303	0.336389	11.57	2.90743
VTKENTIINPSENGDTSTN	2	18.2263	8.98452	9.12949	-0.144967	14.24	-1.01803
VTKENTIINPSENGDTSTNGIKK	4	16.8194	10.9235	10.9375	-0.0139205	17.8	-0.0782049
VTKENTIINPSENGDTSTNGIKKIL	3	22.0455	10.3394	10.2669	0.072557	19.58	0.370567
VTKENTIINPSENGDTSTNGIKKILIF	4	26.4562	9.76492	9.52516	0.239761	21.36	1.12248
VVTSSTTGDLSIPSSELENIPSENQYFQSAIWSGFIK	4	34.0069	10.7281	9.26089	1.46718	29.37	4.99552
VYAVTKENTIINPSENGDTSTNGIKK	4	19.5547	5.24153	4.97126	0.270271	20.47	1.32033
VYAVTKENTIINPSENGDTSTNGIKKIL	3	23.3811	11.0883	10.8715	0.216777	22.25	0.974277
VYAVTKENTIINPSENGDTSTNGIKKILIF	4	27.0524	11.4194	10.9303	0.489093	24.03	2.03534
VYAVTKENTIINPSENGDTSTNGIKKILIFSKKGYEIG	5	25.6254	14.4108	13.8808	0.530002	31.15	1.70145
VYGNIATYNFENGRVR	3	23.6991	4.763	4.85712	-0.0941157	12.46	-0.755343
VYGNIATYNFENGRVRVD	3	24.9503	9.8155	9.16469	0.650801	14.24	4.57023
WSTASDPYSDFEK	2	25.3846	0.48591	0.488698	-0.00278827	8.9	-0.0313289
WSTASDPYSDFEKVTGRID	3	28.1826	2.04967	2.33554	-0.285872	14.24	-2.00753
WTDSQNKKEVISSDNLQLPELKQKSSNSRKKR	5	19.1803	6.77827	6.26847	0.509793	25.81	1.97518
YISNPNYKVN	2	18.6101	2.18053	2.19872	-0.0181865	6.23	-0.291919
YKSSPEKWSTASDPYSDFEK	4	23.2038	1.778	1.70345	0.0745467	14.24	0.523502
YKSSPEKWSTASDPYSDFEKVTGR	4	25.0717	2.30407	2.20181	0.102264	17.8	0.574519
YKSSPEKWSTASDPYSDFEKVTGRID	5	26.0725	2.87724	2.60923	0.268014	19.58	1.36882
YQRENPTEKGLDFKL	4	23.1873	3.72163	2.0089	1.71274	10.68	16.0369
YQRENPTEKGLDFKLY	4	24.2503	3.77073	2.33955	1.43118	11.57	12.3698
YTVDVKNKRTFLSPWISNIHEKK	5	23.0313	6.82901	6.79649	0.0325265	17.8	0.182733
YTVDVKNKRTFLSPWISNIHEKKGLTKYKSSPEKWSTASDPYSDFEK	6	24.4753	11.5904	11.2781	0.312265	37.38	0.83538
YTVDVKNKRTFLSPWISNIHEKKGLTKYKSSPEKWSTASDPYSDFEKVTGRID	6	26.0159	8.64256	8.32623	0.316326	42.72	0.740464
YVNTGTAPIYNVLPTTSLVLGK	3	29.2203	3.55357	3.61192	-0.0583463	16.02	-0.364209
YVNTGTAPIYNVLPTTSLVLGKN	3	28.9056	3.57357	3.59864	-0.0250719	16.91	-0.148267
YVNTGTAPIYNVLPTTSLVLGKNQ	3	28.524	4.45643	4.56613	-0.109704	17.8	-0.616317
YVNTGTAPIYNVLPTTSLVLGKNQTL	3	29.9247	6.16757	6.0468	0.12077	19.58	0.616804
YVNTGTAPIYNVLPTTSLVLGKNQTLATIK	3	28.4848	7.23449	7.15656	0.0779337	23.14	0.336792
YVNTGTAPIYNVLPTTSLVLGKNQTLATIKAKENQL	4	28.7394	9.81681	9.26221	0.5546	28.48	1.94733

## Sheet: p1A06
Peptide sequence	Charge	Retention time (min)	Average Deuterium Uptake (-p1A06) (Da)	Average deuterium uptake (+p1A06) (Da)	Deuterium Uptake Difference (PA - PA:p1A06) (Da)	Max_Deuterium (Da)	Fractional_D_Uptake_Difference(%)
AGPTVPDRDNDGIPDSLEVEGYTVDVK	3	26.367	7.55195	6.77719	0.774758	19.58	3.95689
AHREVINSSTEGLLLNIDKDIRKIL	5	32.5502	7.36095	7.69371	-0.33276	20.47	-1.6256
AKENQLSQILAPNNYYPSKNLAPIAL	3	28.9757	10.042	10.1623	-0.120295	18.69	-0.643632
ANIRYVNTGTAPIYNVLPTTSLVLGKNQTLATIK	4	27.2481	6.81128	6.53754	0.273739	26.7	1.02524
AVNPSDPLETTKPDM	2	22.6551	5.46871	5.38257	0.0861419	8.9	0.967887
AVNPSDPLETTKPDMTL	2	25.4036	6.19026	6.225	-0.0347343	10.68	-0.325228
AVNPSDPLETTKPDMTLK	3	22.4026	6.54172	6.60255	-0.0608302	11.57	-0.525758
AVNPSDPLETTKPDMTLKE	3	22.4796	5.92099	6.08534	-0.164348	12.46	-1.319
AVNPSDPLETTKPDMTLKEA	3	22.8513	6.13849	6.21991	-0.0814187	13.35	-0.609878
AVNPSDPLETTKPDMTLKEALK	3	23.1688	5.83763	5.90053	-0.062902	15.13	-0.415744
AVTKENTIINPSENGDTSTNGIKK	4	17.0694	11.3768	11.7598	-0.383041	18.69	-2.04944
AVTKENTIINPSENGDTSTNGIKKIL	4	22.1155	10.8784	11.1755	-0.297101	20.47	-1.4514
AVTKENTIINPSENGDTSTNGIKKILIF	4	26.3162	10.2215	10.5143	-0.29285	22.25	-1.31618
AVTKENTIINPSENGDTSTNGIKKILIFSKKGYEIG	5	25.0227	16.9659	17.165	-0.199157	29.37	-0.678097
DDFSSTPITMNY	2	28.5546	4.71323	4.77165	-0.0584199	8.01	-0.729337
DDFSSTPITMNYNQFLELEKTKQLRL	4	29.6464	7.43778	7.30033	0.137444	20.47	0.671441
DFNFDQQTSQNIKNQLAEL	2	32.0961	6.55036	4.68296	1.86739	15.13	12.3423
DKIKLNAKMN	2	9.27119	0.223898	0.274078	-0.0501807	7.12	-0.704785
DMLNISSLRQDGKTFID	3	27.8572	6.1877	6.18003	0.00767177	13.35	0.0574664
DRYDMLNISSLRQD	3	25.9085	6.22245	5.92777	0.294672	10.68	2.75911
DRYDMLNISSLRQDGKTF	4	26.5323	6.59682	7.11978	-0.522963	14.24	-3.67249
DRYDMLNISSLRQDGKTFID	4	27.6466	7.42448	7.72193	-0.297455	16.02	-1.85677
DRYDMLNISSLRQDGKTFIDFKKYNDK	5	27.0379	13.1353	13.6183	-0.48301	22.25	-2.17083
DTARLNANIR	3	14.6273	0.715448	0.696266	0.019182	7.12	0.269411
DTDQVYGNIATYNFENGRVR	3	25.7893	11.5049	11.5743	-0.069387	16.02	-0.433127
DTDQVYGNIATYNFENGRVRVD	3	26.7368	12.9345	12.7345	0.200041	17.8	1.12383
EAHREVINSSTEGLLLNIDKDIRK	5	25.7307	8.33657	8.22051	0.11606	19.58	0.592749
EAHREVINSSTEGLLLNIDKDIRKIL	5	32.8609	7.9168	8.1061	-0.189298	21.36	-0.886225
EKTKQLRLDTDQVYGNIATYNFENGRVR	6	24.5872	10.8014	11.0206	-0.219269	23.14	-0.947574
EKTKQLRLDTDQVYGNIATYNFENGRVRVD	5	25.0273	11.9647	12.0673	-0.102565	24.92	-0.411577
ENIPSENQYFQSAIWSGFIK	3	32.7234	4.12708	4.13786	-0.0107811	15.13	-0.0712563
ENTIINPSENGDTSTNGIKKIL	3	23.3834	9.34853	9.53407	-0.185546	16.91	-1.09726
FDQQTSQNIKN	2	8.95748	4.00422	3.41362	0.5906	8.01	7.37329
FEKVTGRID	2	16.995	1.06749	1.01196	0.0555333	6.23	0.891385
FGFNEPNGNLQYQGK	2	24.2221	4.76214	4.77118	-0.00904606	10.68	-0.0847009
FKKYNDKLPLYISNPNYKVN	3	22.3745	6.82109	6.96911	-0.148027	14.24	-1.03951
FLSPWISNIH	2	28.8798	3.06005	3.05337	0.00668601	6.23	0.10732
FLSPWISNIHEK	3	25.5859	3.38386	3.13514	0.248716	8.01	3.10507
FLSPWISNIHEKK	4	23.6549	3.67911	3.69077	-0.0116572	8.9	-0.13098
FLSPWISNIHEKKGLTK	4	22.6177	5.09188	5.19581	-0.103932	12.46	-0.834123
FLSPWISNIHEKKGLTKYKSSPEKWSTASDPYSDFEKVTGRID	6	26.3532	8.85455	8.78034	0.07421	33.82	0.219426
FQSAIWSGFIK	2	29.8942	0.807741	0.80466	0.00308083	8.01	0.0384623
FSSTPITMNYNQFLELEKTKQLRL	4	28.7133	4.79377	4.88763	-0.0938614	18.69	-0.502201
GFNEPNGNLQYQGK	2	20.5757	3.89783	3.94283	-0.0450013	9.79	-0.459666
GFNEPNGNLQYQGKDITEF	2	26.7391	5.21634	5.16063	0.0557184	14.24	0.391281
GKNQTLATIK	2	17.298	4.07267	4.02855	0.0441154	7.12	0.619598
GLLLNIDKDIR	3	25.2163	2.9223	2.98147	-0.0591738	8.01	-0.738749
GLLLNIDKDIRK	3	23.1758	3.79721	4.06919	-0.271977	8.9	-3.05592
GLLLNIDKDIRKIL	4	31.4745	4.0859	4.16269	-0.076793	10.68	-0.719036
GLNTADTARL	2	20.2207	2.95813	2.97682	-0.0186889	7.12	-0.262484
GLNTADTARLN	2	17.8046	3.0388	3.07442	-0.0356169	8.01	-0.444655
GLNTADTARLNANIR	3	19.6788	3.97193	4.16631	-0.194381	11.57	-1.68004
GLTKYKSSPEKWSTASDPYSDFEK	3	22.5077	2.05424	1.92011	0.134127	17.8	0.753521
GLTKYKSSPEKWSTASDPYSDFEKVTGR	5	24.3746	3.19356	3.58021	-0.386647	21.36	-1.81015
GLTKYKSSPEKWSTASDPYSDFEKVTGRID	6	25.1721	3.71447	3.81835	-0.103879	23.14	-0.448916
GLTKYKSSPEKWSTASDPYSDFEKVTGRIDKNVSPEARHPL	6	25.0882	7.99249	7.77344	0.219055	31.15	0.703225
GLTKYKSSPEKWSTASDPYSDFEKVTGRIDKNVSPEARHPLVAAYPIVHVD	6	26.2645	15.9997	16.353	-0.3533	39.16	-0.902196
GNAEVHASF	2	19.5593	3.9189	3.9585	-0.0396007	6.23	-0.635645
GNIATYNFENGRVR	3	21.7696	6.03812	6.1163	-0.0781855	10.68	-0.732074
IAAVNPSDPLETTKPDM	2	23.4653	5.53388	5.46557	0.0683104	10.68	0.639611
IAAVNPSDPLETTKPDMTL	3	25.8405	6.98112	7.21251	-0.231393	12.46	-1.85708
IAAVNPSDPLETTKPDMTLK	3	22.9612	6.32028	6.33588	-0.0155993	13.35	-0.116849
IAAVNPSDPLETTKPDMTLKE	3	23.064	6.95781	7.09778	-0.139977	14.24	-0.982981
IAAVNPSDPLETTKPDMTLKEA	2	23.213	7.11574	7.32369	-0.207951	15.13	-1.37443
IAAVNPSDPLETTKPDMTLKEALK	4	23.8297	6.92382	6.94405	-0.0202221	16.91	-0.119587
IATYNFENGR	2	21.9961	4.70053	4.74597	-0.0454422	7.12	-0.638233
IATYNFENGRVR	3	21.0644	5.88093	5.97315	-0.092217	8.9	-1.03615
IATYNFENGRVRVD	3	23.2715	7.07679	7.2094	-0.132601	10.68	-1.24158
IAVGADESVVK	2	18.0541	2.98969	3.05961	-0.0699192	8.01	-0.872899
IAVGADESVVKE	2	19.3095	2.88311	3.03057	-0.147456	8.9	-1.65681
IAVGADESVVKEAH	3	18.1913	5.60265	5.63601	-0.0333622	10.68	-0.312381
IAVGADESVVKEAHR	4	17.3944	0.574758	0.563504	0.0112541	11.57	0.09727
IAVGADESVVKEAHRE	4	17.9793	1.76757	2.31873	-0.551158	12.46	-4.42342
IAVGADESVVKEAHREVIN	4	20.9241	5.75861	5.97288	-0.214268	15.13	-1.41618
IAVGADESVVKEAHREVINSSTE	3	22.2296	8.13088	8.47991	-0.349026	18.69	-1.86745
IAVGADESVVKEAHREVINSSTEGLLLNIDKDIRK	5	27.5577	10.7341	11.5301	-0.795941	29.37	-2.71005
IAVGADESVVKEAHREVINSSTEGLLLNIDKDIRKIL	5	33.1331	11.6912	11.922	-0.230824	31.15	-0.741008
IDFKKYNDK	3	16.6644	2.69398	2.74334	-0.0493629	6.23	-0.792342
IDKNVSPEARHPL	3	12.2466	1.5886	1.52522	0.0633755	8.01	0.791205
IDKNVSPEARHPLVAAYPIVHVD	4	21.5613	2.30783	2.30235	0.00548031	16.02	0.0342092
IEDTEGLKEVINDRYD	3	24.1869	6.48768	6.85792	-0.370243	12.46	-2.97145
IEDTEGLKEVINDRYDML	3	28.4917	6.83171	7.27881	-0.447095	14.24	-3.13971
IEDTEGLKEVINDRYDMLNISSLRQDGKTFID	5	29.4307	12.9912	13.5441	-0.552921	26.7	-2.07086
IEDTEGLKEVINDRYDMLNISSLRQDGKTFIDFKKYNDK	6	29.1527	16.2499	15.653	0.596912	32.93	1.81267
IIFNGKDLNLVER	3	24.6807	5.33076	5.24904	0.0817232	9.79	0.834762
ILAPNNYYPSK	2	21.1789	2.45358	2.5285	-0.0749232	6.23	-1.20262
ILIRDKRFHYDRNN	4	17.2074	1.41932	1.50144	-0.082123	10.68	-0.768942
IPSENQYFQSAIWSGFIK	2	32.6203	2.62166	3.21844	-0.596781	13.35	-4.47027
IQYQRENPTEK	3	8.71253	3.8221	3.90706	-0.0849584	7.12	-1.19324
IQYQRENPTEKGL	3	18.6804	3.39942	3.41632	-0.0169013	8.9	-0.189902
IQYQRENPTEKGLDFK	3	20.0145	1.75295	2.13836	-0.385417	11.57	-3.33117
IQYQRENPTEKGLDFKLY	4	24.4591	4.02031	4.07209	-0.0517833	13.35	-0.38789
IRYVNTGTAPIYNVLPTTSLVLGK	3	27.6955	5.69011	5.54078	0.149334	17.8	0.838958
IRYVNTGTAPIYNVLPTTSLVLGKN	3	27.3385	4.13484	4.05372	0.0811161	18.69	0.434008
IRYVNTGTAPIYNVLPTTSLVLGKNQ	3	27.3081	4.66274	5.02344	-0.360696	19.58	-1.84217
IRYVNTGTAPIYNVLPTTSLVLGKNQTL	3	28.4565	5.50003	5.77713	-0.277095	21.36	-1.29726
IRYVNTGTAPIYNVLPTTSLVLGKNQTLATIK	4	27.1947	7.33672	6.79606	0.540663	24.92	2.16959
IRYVNTGTAPIYNVLPTTSLVLGKNQTLATIKAKENQL	5	28.0451	10.2695	10.4802	-0.210725	30.26	-0.696383
IRYVNTGTAPIYNVLPTTSLVLGKNQTLATIKAKENQLSQILAPNNYYPSKNLAPIAL	5	32.4062	19.2344	19.9291	-0.694667	45.39	-1.53044
ISNPNYKVN	2	14.9683	1.40639	1.42346	-0.0170742	5.34	-0.319742
ISNPNYKVNVY	2	21.8352	1.20259	1.21488	-0.0122859	7.12	-0.172555
KENTIINPSENGDTSTNGIKKIL	4	21.9217	9.36414	9.85807	-0.493935	17.8	-2.77492
KEVISSDNLQLPELKQKSSNSRKKR	6	18.2775	7.13686	6.7067	0.430157	19.58	2.19692
KNVSPEARHPLVAAYPIVHVD	3	20.8563	1.43347	1.28678	0.146694	14.24	1.03016
KWSTASDPYSDFEK	3	23.5682	2.20534	2.4053	-0.199954	9.79	-2.04243
KWSTASDPYSDFEKVTGRID	4	26.69	2.74117	2.56655	0.174625	15.13	1.15417
LELEKTKQL	2	18.0869	0.406233	0.457457	-0.0512247	6.23	-0.822226
LELEKTKQLR	3	10.6784	0.39565	0.4412	-0.0455505	7.12	-0.639755
LELEKTKQLRL	3	20.6462	0.572048	0.529448	0.0426006	8.01	0.531843
LELEKTKQLRLD	3	19.8787	4.31519	4.32726	-0.0120785	8.9	-0.135713
LENIPSENQYFQSAIWSGFIK	3	33.0978	2.86673	3.08027	-0.213543	16.02	-1.33298
LKIAFGFNEPNGNLQYQGK	3	25.8101	3.25178	3.84952	-0.597741	14.24	-4.19762
LLNIDKDIRK	3	18.4015	3.30284	3.35466	-0.0518255	7.12	-0.727886
LLNIDKDIRKIL	3	26.3929	3.18305	3.17915	0.00389637	8.9	0.0437794
LNIDKDIRKIL	3	24.6899	3.273	3.25429	0.0187036	8.01	0.233503
LPLYISNPNYKVN	2	24.4241	4.15137	4.24075	-0.0893786	8.01	-1.11584
LPLYISNPNYKVNVY	2	27.1602	5.22954	5.2813	-0.0517581	9.79	-0.528684
LSIPSSELENIPSENQYFQSAIWSGFIK	3	33.9016	5.85492	5.95897	-0.104048	21.36	-0.487116
LSPWISNIHEKK	4	20.6087	3.91189	3.94677	-0.0348821	8.01	-0.435482
LVAAYPIVHVD	2	23.6595	0.861054	0.632204	0.22885	7.12	3.21418
LYWTDSQNK	2	22.7859	2.97794	2.91962	0.058315	6.23	0.936036
NATNIYTVLDK	2	24.5338	4.71474	2.49007	2.22467	8.01	27.7737
NATNIYTVLDKIKLNAKMN	4	27.9985	4.93144	3.128	1.80344	15.13	11.9196
NATNIYTVLDKIKLNAKMNIL	4	30.5327	4.58457	2.90258	1.68199	16.91	9.94672
NDKLPLYISNPNYKVN	3	23.5497	5.0794	5.14308	-0.0636854	10.68	-0.596305
NFDQQTSQNIK	2	17.1229	3.77473	3.37291	0.401824	8.01	5.01653
NFDQQTSQNIKN	2	16.3998	4.18467	3.64261	0.542061	8.9	6.09058
NFDQQTSQNIKNQ	2	17.6051	4.23641	3.61607	0.620342	9.79	6.33649
NFDQQTSQNIKNQLAEL	2	29.4681	5.92852	4.09984	1.82868	13.35	13.698
NFENGRVRVD	3	18.6499	4.81014	4.88181	-0.0716642	7.12	-1.00652
NIATYNFENGRVR	3	21.814	4.65233	4.57782	0.0745132	9.79	0.761116
NIAVGADESVVK	2	19.1052	3.1589	3.26175	-0.10285	8.9	-1.15562
NIAVGADESVVKEAHREVIN	3	21.6126	6.12485	6.35373	-0.228874	16.02	-1.42868
NKRTFLSPWISNIH	3	26.2904	4.22453	4.51855	-0.294028	9.79	-3.00335
NKRTFLSPWISNIHEK	5	23.9479	3.86205	3.86777	-0.00572199	11.57	-0.0494554
NKRTFLSPWISNIHEKK	5	22.2342	4.55309	4.49004	0.0630452	12.46	0.505981
NKRTFLSPWISNIHEKKGLTK	4	21.8935	3.54366	3.96906	-0.425394	16.02	-2.65539
NKRTFLSPWISNIHEKKGLTKYKSSPEKWSTASDPYSDFEK	5	23.9807	6.34135	7.21392	-0.87257	32.04	-2.72338
NKRTFLSPWISNIHEKKGLTKYKSSPEKWSTASDPYSDFEKVTGR	6	25.1371	6.92772	6.90288	0.0248326	35.6	0.0697546
NKRTFLSPWISNIHEKKGLTKYKSSPEKWSTASDPYSDFEKVTGRID	5	25.7376	8.28555	8.20695	0.078594	37.38	0.210257
NQLSQILAPNNYYPSKNLAPIAL	2	30.5657	9.33796	8.57197	0.765989	16.02	4.78146
NTADTARLNANIR	3	17.0365	2.39834	2.37487	0.0234639	9.79	0.239672
NTADTARLNANIRYVNTGTAPIYNVLPTTSLVLGKNQTLATIK	5	27.7374	8.97755	8.91141	0.0661485	34.71	0.190575
NTIINPSENGDTSTNGIKK	3	17.3193	9.55322	9.6563	-0.103075	14.24	-0.723838
NTIINPSENGDTSTNGIKKIL	3	23.0267	9.01867	9.08187	-0.0632053	16.02	-0.39454
NVLPTTSLVLGK	2	23.9876	2.49919	2.47185	0.0273416	8.01	0.341343
NVLPTTSLVLGKN	2	23.7364	3.27897	3.26105	0.0179184	8.9	0.20133
NVLPTTSLVLGKNQ	2	23.5377	3.72766	3.83149	-0.103834	9.79	-1.06061
NVLPTTSLVLGKNQTL	2	25.672	4.07048	4.15979	-0.0893098	11.57	-0.771909
NVLPTTSLVLGKNQTLATIK	3	24.4615	5.87262	5.898	-0.0253776	15.13	-0.16773
PLVAAYPIVHVD	2	25.2001	0.613377	0.575686	0.0376909	7.12	0.529366
PTEKGLDFKLY	3	25.1324	1.96534	1.99162	-0.0262804	7.12	-0.369107
PTTSLVLGK	2	18.8727	1.40546	1.50059	-0.0951388	5.34	-1.78163
PTTSLVLGKN	2	18.5163	2.19492	2.1923	0.00261669	6.23	0.0420014
PTTSLVLGKNQ	2	18.4413	2.46081	2.6407	-0.179887	7.12	-2.5265
PTTSLVLGKNQTL	2	22.7951	3.75607	3.76769	-0.0116218	8.9	-0.130582
PTTSLVLGKNQTLATIK	3	21.7719	5.15077	4.26121	0.889566	12.46	7.13937
QEVINKASNSNKIRLEKGRLYQIK	5	18.4696	7.03135	7.18062	-0.149272	19.58	-0.762368
QLRLDTDQVYGNIATYNFENGRVR	4	26.5099	8.87002	9.05195	-0.181934	19.58	-0.929183
QLSQILAPNNYYPSKNLAPIAL	2	29.372	8.13456	8.15149	-0.0169302	15.13	-0.111898
QRENPTEKGLDFKLY	4	23.7341	3.72251	3.67899	0.04352	10.68	0.407491
QSAIWSGFIK	2	28.4172	0.0481281	0.138914	-0.0907857	7.12	-1.27508
QVYGNIATYNFENGRVR	3	24.0064	3.34861	3.41327	-0.0646604	13.35	-0.484348
QYFQSAIWSGFIK	2	31.6094	0.753192	0.945553	-0.192361	9.79	-1.96488
REVINSSTEGLLLNIDKDIRKIL	5	33.47	7.33637	7.54058	-0.204207	18.69	-1.0926
RLDTDQVYGNIATYNFENGRVR	4	25.2726	9.71459	10.3584	-0.643801	17.8	-3.61686
RLDTDQVYGNIATYNFENGRVRVD	4	25.8733	10.9885	11.325	-0.336471	19.58	-1.71844
RNNIAVGADESVVK	3	17.2564	3.58322	3.58321	9.93953e-06	10.68	9.30667e-05
SENQYFQSAIWSGFIK	3	32.1376	0.620147	0.728721	-0.108573	12.46	-0.871376
SEVLPQIQETTAR	2	21.5309	1.53023	1.49575	0.0344768	8.9	0.387379
SEVLPQIQETTARIIFN	3	30.1699	1.40085	1.45903	-0.0581822	12.46	-0.466952
SEVLPQIQETTARIIFNGK	3	28.8355	1.93488	1.99715	-0.0622638	14.24	-0.437246
SEVLPQIQETTARIIFNGKDL	3	30.5917	3.34542	3.50079	-0.155374	16.02	-0.969873
SEVLPQIQETTARIIFNGKDLNL	3	31.2937	4.11473	4.09363	0.0211005	17.8	0.118542
SEVLPQIQETTARIIFNGKDLNLVER	4	29.6863	3.92628	4.0384	-0.11212	20.47	-0.547729
SKNEDQSTQNTDSETRTISKNTSTSRTHTSEVHGN	6	14.421	13.0294	12.883	0.146425	29.37	0.498552
SLSLAGERTW	2	25.3337	4.28094	4.32554	-0.0446077	7.12	-0.626513
SLSLAGERTWAETMGL	2	31.4722	8.26632	8.35446	-0.0881392	12.46	-0.707377
SPEKWSTASDPYSDFEK	3	24.0111	2.04647	1.64343	0.403035	11.57	3.48345
SPEKWSTASDPYSDFEKVTGRID	4	26.9962	3.60804	3.01268	0.595359	16.91	3.52075
SQILAPNNYYPSK	2	22.4819	3.8992	3.70821	0.19099	8.01	2.38439
SQILAPNNYYPSKNLAPIAL	2	27.754	6.78586	6.9734	-0.187547	13.35	-1.40485
SQNKKEVISSDNLQLPELKQKSSNSRKKR	5	17.2541	6.77131	7.17337	-0.40206	23.14	-1.73751
SSPEKWSTASDPYSDFEK	3	24.018	2.5937	2.13176	0.461945	12.46	3.70742
SSPEKWSTASDPYSDFEKVTGRID	4	27.0264	3.8917	3.97622	-0.0845202	17.8	-0.474832
SSTEGLLLNIDKD	2	25.7962	4.16506	4.167	-0.00194118	9.79	-0.0198282
SSTEGLLLNIDKDIR	3	27.2388	4.10713	4.1435	-0.0363679	11.57	-0.314329
SSTEGLLLNIDKDIRK	3	25.4434	4.73564	5.02794	-0.292298	12.46	-2.34589
SSTEGLLLNIDKDIRKIL	4	33.2037	5.46107	5.49825	-0.0371759	14.24	-0.261067
SSTEGLLLNIDKDIRKILSGY	3	36.2109	7.16592	7.86921	-0.703294	16.91	-4.15904
SSTEGLLLNIDKDIRKILSGYIVEIEDTEGLKEVINDRYD	5	38.6082	12.9105	12.2001	0.710322	33.82	2.1003
STSAGPTVPDRDNDGIPDSLEVEGYTVDVK	3	26.194	6.57445	6.49992	0.0745339	22.25	0.334984
STSAGPTVPDRDNDGIPDSLEVEGYTVDVKNKRT	5	23.6687	5.30582	5.11606	0.189755	25.81	0.7352
STSAGPTVPDRDNDGIPDSLEVEGYTVDVKNKRTFLSPWISNIHEKK	6	27.0876	11.5583	11.7322	-0.173915	36.49	-0.476611
TDQVYGNIATYNFENGRVR	3	24.7765	8.90008	8.78289	0.117189	15.13	0.774544
TEGLKEVINDRYD	3	22.3349	5.48063	5.82144	-0.340816	9.79	-3.48127
TFLSPWISNIH	2	30.6688	3.1153	3.10379	0.0115109	7.12	0.16167
TFLSPWISNIHEK	3	27.9296	3.71323	3.72896	-0.0157333	8.9	-0.176778
TFLSPWISNIHEKK	3	25.829	3.86915	3.93223	-0.0630803	9.79	-0.644334
TFLSPWISNIHEKKGLTK	4	24.8536	5.1234	5.24073	-0.117335	13.35	-0.878915
TFLSPWISNIHEKKGLTKYKSSPEKWSTASDPYSDFEKVTGRID	6	27.1579	9.07302	9.02585	0.0471681	34.71	0.135892
TGSNWSEVLPQIQETTAR	3	27.586	4.07753	3.62497	0.452563	13.35	3.38999
TGSNWSEVLPQIQETTARIIFNGK	3	33.5239	4.37089	5.10355	-0.732663	18.69	-3.92008
TGSNWSEVLPQIQETTARIIFNGKDLNL	3	34.669	6.49342	6.67793	-0.184508	22.25	-0.82925
TGSNWSEVLPQIQETTARIIFNGKDLNLVER	4	33.4819	5.80923	6.87592	-1.06669	24.92	-4.28047
TGSNWSEVLPQIQETTARIIFNGKDLNLVERRIA	5	33.3114	7.2315	7.60499	-0.373492	27.59	-1.35372
TGTAPIYNVLPTTSLVLGKNQTLATIK	3	27.6863	8.34345	8.46677	-0.123324	20.47	-0.602461
TIINPSENGDTSTNGIKK	3	17.17	8.86283	8.84008	0.0227503	13.35	0.170415
TIINPSENGDTSTNGIKKIL	3	22.9215	8.25035	8.40312	-0.15277	15.13	-1.00972
TIINPSENGDTSTNGIKKILIF	3	27.9634	7.69258	7.71755	-0.0249719	16.91	-0.147675
TTARIIFNGK	3	17.9224	1.02628	0.949529	0.0767538	7.12	1.078
TVLDKIKLNAKMN	4	21.7461	2.73101	2.68307	0.0479318	9.79	0.489599
TYNFENGRVR	3	19.3141	4.66008	4.77756	-0.117486	7.12	-1.65009
VAAYPIVH	2	19.0021	0.39731	0.321152	0.0761583	4.45	1.71142
VAAYPIVHVD	2	21.8232	0.618115	0.50802	0.110095	6.23	1.76718
VDDQEVINKASNSNKIR	4	18.2964	7.37421	7.5007	-0.126493	13.35	-0.947514
VDDQEVINKASNSNKIRLEKGRLYQIK	5	21.0409	9.40902	9.57074	-0.16172	22.25	-0.726829
VDTGSNWSEVLPQIQETTAR	2	28.0871	4.4733	4.62039	-0.147094	15.13	-0.972203
VDTGSNWSEVLPQIQETTARIIFNGK	3	34.091	4.92518	5.19113	-0.265956	20.47	-1.29925
VDTGSNWSEVLPQIQETTARIIFNGKDLNL	3	35.0478	6.15168	6.33091	-0.17922	24.03	-0.745819
VDTGSNWSEVLPQIQETTARIIFNGKDLNLVER	4	33.799	9.51541	9.25657	0.258842	26.7	0.969446
VDTGSNWSEVLPQIQETTARIIFNGKDLNLVERRIA	5	33.5872	8.60868	8.51861	0.0900748	29.37	0.30669
VERRIAAVNPSDPLETTKPDMTLKEA	5	21.7765	8.8294	8.74762	0.0817825	18.69	0.437574
VERRIAAVNPSDPLETTKPDMTLKEALK	5	22.4422	7.57757	7.80519	-0.227618	20.47	-1.11196
VINSSTEGLLLNIDKDIRK	4	27.0217	5.67925	5.89439	-0.215143	15.13	-1.42196
VINSSTEGLLLNIDKDIRKIL	4	34.3596	6.28021	6.38503	-0.10482	16.91	-0.619868
VINSSTEGLLLNIDKDIRKILSGYIVE	3	37.6294	7.63092	7.80107	-0.170153	22.25	-0.764731
VKKSDEYTFATSADNH	3	18.1684	4.69242	4.62936	0.0630549	12.46	0.506059
VKNKRTFLSPWISNIHEK	5	22.6924	4.56795	4.62296	-0.055009	13.35	-0.412053
VKNKRTFLSPWISNIHEKK	5	21.1018	6.46055	6.81441	-0.353864	14.24	-2.485
VKNKRTFLSPWISNIHEKKGLTK	5	20.8027	6.24359	6.29731	-0.0537246	17.8	-0.301824
VKNKRTFLSPWISNIHEKKGLTKYKSSPEKWSTASDPYSDFEK	6	23.4958	7.173	7.57449	-0.401498	33.82	-1.18716
VKNKRTFLSPWISNIHEKKGLTKYKSSPEKWSTASDPYSDFEKVTGR	6	24.7273	8.11189	7.95458	0.157307	37.38	0.420833
VKNKRTFLSPWISNIHEKKGLTKYKSSPEKWSTASDPYSDFEKVTGRID	6	25.3707	7.42062	7.33788	0.0827334	39.16	0.21127
VLGKNQTLATIK	2	17.2097	4.53364	4.59933	-0.0656936	8.9	-0.73813
VLGKNQTLATIKAKEN	4	17.0671	7.33199	7.37005	-0.038058	12.46	-0.305441
VLGKNQTLATIKAKENQL	4	21.6689	8.08205	8.19445	-0.112396	14.24	-0.789298
VLPQIQETTAR	2	19.7466	0.755056	0.778887	-0.0238309	7.12	-0.334704
VNPSDPLETTKPDMTL	2	25.3031	4.91395	5.03818	-0.124224	9.79	-1.26888
VNPSDPLETTKPDMTLKEA	3	22.6785	5.92099	6.08432	-0.163335	12.46	-1.31088
VNPSDPLETTKPDMTLKEALK	4	23.2365	5.28935	5.36002	-0.0706695	14.24	-0.496274
VTGRIDKNVSPEARHPL	4	15.2055	5.36669	5.88551	-0.51882	11.57	-4.48418
VTKENTIINPSENGDTSTN	2	18.2263	8.98452	9.22911	-0.244591	14.24	-1.71763
VTKENTIINPSENGDTSTNGIKK	4	16.8194	10.9235	11.3416	-0.418052	17.8	-2.34861
VTKENTIINPSENGDTSTNGIKKIL	4	22.0219	9.99974	10.2653	-0.265565	19.58	-1.3563
VTKENTIINPSENGDTSTNGIKKILIF	4	26.4562	9.76492	9.84972	-0.0848015	21.36	-0.397011
VVTSSTTGDLSIPSSELENIPSENQYFQSAIWSGFIK	4	34.0069	10.8581	10.8502	0.00789158	29.37	0.0268695
VYAVTKENTIINPSENGDTSTNGIKKIL	4	23.1454	11.0126	11.3142	-0.301619	22.25	-1.35559
VYAVTKENTIINPSENGDTSTNGIKKILIF	4	27.0524	11.4194	11.3552	0.0641074	24.03	0.266781
VYAVTKENTIINPSENGDTSTNGIKKILIFSKKGYEIG	6	25.5928	17.479	17.9397	-0.460707	31.15	-1.47899
VYGNIATYNFENGRVR	3	23.6991	4.763	5.30602	-0.543018	12.46	-4.35809
WSTASDPYSDFEK	2	25.3846	0.48591	0.423104	0.0628054	8.9	0.705679
WSTASDPYSDFEKVTGR	3	27.2154	2.60765	3.17802	-0.570377	12.46	-4.57766
WSTASDPYSDFEKVTGRID	3	28.1826	2.04967	2.12389	-0.074223	14.24	-0.521229
WTDSQNKKEVISSDNLQLPELKQKSSNSRKKR	5	19.1803	6.77827	6.92956	-0.1513	25.81	-0.586206
YISNPNYKVN	2	18.6101	2.18053	2.22723	-0.0466983	6.23	-0.749571
YKSSPEKWSTASDPYSDFEK	3	23.0336	1.6581	2.1181	-0.460003	14.24	-3.23036
YKSSPEKWSTASDPYSDFEKVTGR	4	25.0717	2.30407	2.67927	-0.375191	17.8	-2.10781
YKSSPEKWSTASDPYSDFEKVTGRID	4	26.0702	2.94598	3.16124	-0.215265	19.58	-1.09941
YQRENPTEKGLDFKL	4	23.1873	3.72163	3.8543	-0.132671	10.68	-1.24224
YQRENPTEKGLDFKLY	4	24.2503	3.77073	4.08129	-0.310554	11.57	-2.68413
YTVDVKNKRTFLSPWISNIHEKK	5	23.0313	6.82901	6.98718	-0.158166	17.8	-0.888572
YTVDVKNKRTFLSPWISNIHEKKGLTKYKSSPEKWSTASDPYSDFEKVTGRID	6	26.0159	8.64256	8.53037	0.112189	42.72	0.262614
YVNTGTAPIYNVLPTTSLVLGK	2	29.2555	4.06428	4.83418	-0.7699	16.02	-4.80587
YVNTGTAPIYNVLPTTSLVLGKN	3	28.9056	3.57357	3.92973	-0.356164	16.91	-2.10623
YVNTGTAPIYNVLPTTSLVLGKNQ	3	28.524	4.45643	4.46087	-0.00444528	17.8	-0.0249735
YVNTGTAPIYNVLPTTSLVLGKNQTL	3	29.9247	6.16757	6.08633	0.0812455	19.58	0.414941
YVNTGTAPIYNVLPTTSLVLGKNQTLATIK	4	28.2835	6.41737	6.6302	-0.212835	23.14	-0.919769
YVNTGTAPIYNVLPTTSLVLGKNQTLATIKAKENQL	4	28.7394	9.81681	9.48353	0.333277	28.48	1.17021

## Sheet: p6C01
Peptide sequence	Charge	Retention time (min)	Average Deuterium Uptake (-p6C01) (Da)	Average deuterium uptake (+p6C01) (Da)	Deuterium Uptake Difference (PA - PA:p6C01) (Da)	Max_Deuterium (Da)	Fractional_D_Uptake_Difference(%)
AETMGLNTADTARL	2	24.1558	2.35486	2.35718	-0.00231913	10.8	-0.0214735
AKENQLSQILAPNNYYPSKNLAPIAL	3	29.4439	10.0736	9.46003	0.613617	18.9	3.24665
APMVVTSSTTGDLSIPSSELENIPSENQYFQSAIWSGFIK	4	34.7169	9.48775	9.06696	0.420789	31.5	1.33584
AVNPSDPLETTKPDMTL	2	26.006	4.63917	2.04908	2.59009	10.8	23.9823
AVNPSDPLETTKPDMTLK	3	22.8438	4.82468	2.05113	2.77355	11.7	23.7056
AVNPSDPLETTKPDMTLKE	3	22.9856	4.34264	1.81447	2.52817	12.6	20.0648
AVNPSDPLETTKPDMTLKEA	2	23.2698	5.96886	3.18881	2.78006	13.5	20.593
AVNPSDPLETTKPDMTLKEALK	3	23.6758	4.23136	1.72089	2.51048	15.3	16.4083
AVNPSDPLETTKPDMTLKEALKIAF	4	30.2801	3.29782	1.6979	1.59992	18	8.88847
AVTKENTIINPSENGDTSTNGIKK	4	17.4114	8.3746	8.26642	0.108182	18.9	0.572392
AVTKENTIINPSENGDTSTNGIKKIL	3	22.7571	7.229	6.64186	0.587137	20.7	2.83641
AVTKENTIINPSENGDTSTNGIKKILIF	4	26.8695	6.49311	6.06812	0.424995	22.5	1.88887
AVTKENTIINPSENGDTSTNGIKKILIFSKKGYEIG	5	25.5615	10.8703	10.3601	0.510248	29.7	1.71801
DDFSSTPITMNYN	2	27.4213	4.53273	4.4163	0.116427	9	1.29363
DDFSSTPITMNYNQFLELEKTKQLRLDTDQVYGNIATYNFENGRVR	6	30.2488	15.8365	14.3579	1.47864	38.7	3.82078
DFNFDQQTSQNIKNQLAEL	2	31.9862	4.87648	4.66171	0.214776	15.3	1.40376
DITEFDFNFDQQTSQNIKNQLAEL	3	34.9211	6.57961	6.28387	0.295744	19.8	1.49366
DKRFHYDRNNIAVGADESVVKEAHREVINSSTEGLLLNIDKDIRKILSGYIVE	6	35.7525	11.1548	10.4342	0.720556	45.9	1.56984
DRYDMLNISSLRQD	3	26.4339	6.37722	6.29836	0.0788571	10.8	0.730158
DRYDMLNISSLRQDGKTF	4	26.9191	6.27355	5.95868	0.314876	14.4	2.18664
DRYDMLNISSLRQDGKTFID	3	27.9926	6.21666	5.79158	0.42508	16.2	2.62395
DRYDMLNISSLRQDGKTFIDFKKYNDK	6	27.287	7.66253	7.41118	0.251347	22.5	1.1171
DRYDMLNISSLRQDGKTFIDFKKYNDKLPLYISNPNYKVN	6	29.149	11.6925	11.653	0.0395639	32.4	0.122111
DTDQVYGNIATYNFENGRVR	3	25.9329	10.255	8.66931	1.58573	16.2	9.78847
DTDQVYGNIATYNFENGRVRVD	3	27.0368	11.9731	10.041	1.93211	18	10.7339
EAHREVINSSTEGLLLNIDKDIRK	5	26.0681	7.76772	7.43913	0.32859	19.8	1.65955
EAHREVINSSTEGLLLNIDKDIRKIL	5	32.9489	6.19893	5.81913	0.379802	21.6	1.75834
EKTKQLRLDTDQVYGNIATYNFENGRVR	4	24.7708	10.2738	8.1434	2.13044	23.4	9.10446
ENTIINPSENGDTSTNGIKKIL	3	23.9267	6.58436	6.05613	0.528221	17.1	3.08901
EVINSSTEGLLLNIDKDIRK	4	28.3282	5.51244	5.28627	0.226171	16.2	1.39612
FGFNEPNGNLQYQGK	2	24.7472	3.54369	3.25567	0.288019	10.8	2.66684
FKKYNDKLPLYISNPNYKVNVYAVTKENTIINPSENGDTSTNGIKKIL	6	26.3499	11.2835	10.6722	0.611316	38.7	1.57963
FLSPWISNIH	2	29.2662	2.41375	2.04463	0.36912	6.3	5.85905
FLSPWISNIHEK	3	26.0858	2.25299	1.99207	0.260927	8.1	3.22132
FLSPWISNIHEKK	3	24.0559	2.36669	2.3941	-0.0274086	9	-0.304539
FLSPWISNIHEKKG	4	23.8815	4.84519	5.03118	-0.185998	9.9	-1.87876
FQSAIWSGFIK	2	30.2417	0.0737641	0.131536	-0.0577724	8.1	-0.71324
GDTSTNGIKKIL	3	20.2227	3.2853	3.1695	0.1158	9	1.28667
GFNEPNGNLQYQGK	2	20.9981	4.35844	4.16555	0.192885	9.9	1.94833
GFNEPNGNLQYQGKDITEFDFNFDQQTSQNIKNQLAEL	4	33.1353	7.53111	7.27502	0.256089	31.5	0.812981
GFNEPNGNLQYQGKDITEFDFNFDQQTSQNIKNQLAELNATNIYTVLDKIKLN	5	35.4854	14.4191	13.3972	1.02187	45	2.27082
GKDITEFDFNFDQQTSQNIKNQLAEL	3	32.348	5.41389	5.21723	0.196665	21.6	0.910486
GKTFIDFKKYNDK	4	19.908	2.14631	1.91422	0.232086	9.9	2.34431
GLKEVINDRYD	3	21.6994	3.14498	3.09421	0.0507739	8.1	0.626838
GLKEVINDRYDMLNISSLRQDGKTFIDFKKYNDK	6	28.4331	12.7514	11.9712	0.780216	28.8	2.70908
GLKEVINDRYDMLNISSLRQDGKTFIDFKKYNDKLPLYISNPNYKVN	6	29.8736	16.2137	14.7109	1.50271	38.7	3.88298
GLLLNIDKDIR	3	25.6558	2.026	1.95879	0.0672048	8.1	0.829689
GLLLNIDKDIRK	3	23.6003	2.82003	2.60971	0.210328	9	2.33697
GLLLNIDKDIRKIL	3	31.3872	3.55312	3.3145	0.238623	10.8	2.20947
GLNTADTARL	2	20.5273	1.97708	1.8885	0.0885734	7.2	1.23019
GLNTADTARLN	2	17.9707	2.0847	2.08466	4.3518e-05	8.1	0.000537259
GLNTADTARLNANIR	3	20.0406	2.21836	1.93803	0.280337	11.7	2.39605
GLNTADTARLNANIRYVNTGTAPIYNVLPTTSLVLGKNQTLATIK	5	28.7659	7.01674	6.28059	0.736154	36.9	1.995
GLTKYKSSPEKWSTASDPYSDFEK	3	22.4707	1.31173	0.611779	0.699952	18	3.88862
GLTKYKSSPEKWSTASDPYSDFEKVTGR	5	24.5711	3.54401	3.49192	0.0520949	21.6	0.24118
GLTKYKSSPEKWSTASDPYSDFEKVTGRID	4	25.573	3.78058	3.65198	0.128602	23.4	0.549582
GLTKYKSSPEKWSTASDPYSDFEKVTGRIDKNVSPEAR	6	25.2741	6.93138	7.91343	-0.982053	29.7	-3.30658
GLTKYKSSPEKWSTASDPYSDFEKVTGRIDKNVSPEARHPL	6	25.4107	3.80495	3.18876	0.616195	31.5	1.95617
GLTKYKSSPEKWSTASDPYSDFEKVTGRIDKNVSPEARHPLVAAYPIVHVD	6	26.7888	6.52897	6.2684	0.260576	39.6	0.65802
GNIATYNFENGRVR	3	21.8178	5.55693	4.43081	1.12613	10.8	10.4271
GNIATYNFENGRVRVD	3	23.8199	7.30874	5.87774	1.431	12.6	11.3572
IAAVNPSDPLETTKPDMTL	2	26.5855	5.0994	2.73043	2.36897	12.6	18.8014
IAAVNPSDPLETTKPDMTLK	3	23.4956	5.40945	2.63661	2.77284	13.5	20.5395
IAAVNPSDPLETTKPDMTLKEA	3	23.7611	5.46951	2.56229	2.90722	15.3	19.0014
IAAVNPSDPLETTKPDMTLKEALK	4	24.4228	5.52634	2.99084	2.5355	17.1	14.8275
IAFGFNEPNGNLQYQGKDITEFDFNFDQQTSQNIKNQLAELNATNIYTVLDKIKLNAKMN	6	35.5586	14.351	14.3951	-0.0441011	51.3	-0.0859671
IATYNFENGRVR	3	21.2967	5.21501	4.37839	0.836619	9	9.29577
IATYNFENGRVRVD	3	23.2636	6.37889	5.34422	1.03466	10.8	9.5802
IAVGADESVVKE	2	19.6733	1.83909	1.59082	0.248273	9	2.75859
IAVGADESVVKEAH	3	18.2938	2.8083	3.02559	-0.217292	10.8	-2.01196
IAVGADESVVKEAHR	4	17.7534	0.35683	0.544549	-0.187719	11.7	-1.60444
IAVGADESVVKEAHREVIN	3	21.1683	3.836	3.5282	0.307807	15.3	2.01181
IAVGADESVVKEAHREVINSSTE	3	22.299	6.17183	5.72791	0.443916	18.9	2.34876
IAVGADESVVKEAHREVINSSTEGLLLNIDKDIRK	5	27.9855	9.24478	8.86911	0.375675	29.7	1.2649
IAVGADESVVKEAHREVINSSTEGLLLNIDKDIRKIL	5	33.1896	11.6419	10.9144	0.727526	31.5	2.30961
IAVGADESVVKEAHREVINSSTEGLLLNIDKDIRKILSGYIVE	5	36.817	9.98938	9.47127	0.518105	36.9	1.40408
IDKNVSPEARHPLVAAYPIVHVD	4	21.7697	1.39336	1.01174	0.381619	16.2	2.35567
IEDTEGLKEVIN	2	22.6667	3.34909	3.09556	0.253532	9	2.81702
IEDTEGLKEVINDRYD	3	24.5764	4.78087	4.37577	0.405101	12.6	3.21509
IEDTEGLKEVINDRYDMLNISSLRQDGKTF	5	29.2009	10.074	8.97319	1.10084	25.2	4.3684
IEDTEGLKEVINDRYDMLNISSLRQDGKTFID	4	29.8332	12.4554	11.8996	0.555786	27	2.05847
IEDTEGLKEVINDRYDMLNISSLRQDGKTFIDFKKYNDK	6	29.1938	12.1087	11.2967	0.811989	33.3	2.43841
IEDTEGLKEVINDRYDMLNISSLRQDGKTFIDFKKYNDKLPLYISNPNYKVN	6	30.3113	17.4588	15.9141	1.54473	43.2	3.57577
IEDTEGLKEVINDRYDMLNISSLRQDGKTFIDFKKYNDKLPLYISNPNYKVNVY	6	30.7478	19.8278	19.1677	0.660196	45	1.4671
IIFNGKDLNLVER	3	25.1652	2.55313	2.51068	0.0424482	9.9	0.42877
IIFNGKDLNLVERR	4	23.8128	2.23441	2.1298	0.104613	10.8	0.96864
IIFNGKDLNLVERRIA	4	25.729	2.14937	1.96283	0.18654	12.6	1.48047
IIFNGKDLNLVERRIAAVNPSDPLETTKPDMTLKEALK	6	28.6458	8.95297	7.01434	1.93863	29.7	6.52738
IILSKNEDQSTQNTDSETRTISKNTSTSRTHTSEVHGN	6	16.0765	8.29711	7.7397	0.557413	32.4	1.72041
ILAPNNYYPSK	2	21.6663	2.2857	2.50021	-0.21451	6.3	-3.40493
ILIRDKRFHYDRNN	4	17.2644	0.637599	0.589095	0.0485037	10.8	0.449109
IQYQRENPTEKGL	3	18.3451	2.54727	2.36909	0.178176	9	1.97973
IQYQRENPTEKGLDFK	3	20.2085	3.98002	3.76949	0.210528	11.7	1.79939
IQYQRENPTEKGLDFKLY	4	25.0133	2.33606	2.09156	0.244497	13.5	1.81109
IQYQRENPTEKGLDFKLYWTDSQNKKEVISSDNLQLPELKQKSSNSRKKR	6	24.6189	5.35036	4.79493	0.555431	41.4	1.34162
IRYVNTGTAPIYNVLPTTSLVLGK	3	28.3927	4.60071	4.28715	0.31356	18	1.742
IRYVNTGTAPIYNVLPTTSLVLGKN	3	28.2436	3.11776	2.28796	0.829802	18.9	4.39049
IRYVNTGTAPIYNVLPTTSLVLGKNQ	3	28.0165	3.96313	3.39574	0.567391	19.8	2.86561
ISNPNYKVNVY	2	21.8558	0.903834	0.781303	0.12253	7.2	1.70181
ISSLRQDGKTFIDFKKYNDK	5	21.7466	4.47092	3.75302	0.717899	16.2	4.43147
ITEFDFNFDQQTSQNIKNQLAEL	3	33.518	6.54705	6.34041	0.206644	18.9	1.09336
KENTIINPSENGDTSTNGIKKIL	4	22.2919	7.36722	7.35837	0.00884989	18	0.0491661
KEVISSDNLQLPELKQKSSNSRKKR	5	18.6365	3.80374	2.62201	1.18173	19.8	5.96834
KNVSPEARHPLVAAYPIVHVD	3	21.2661	1.0334	0.951711	0.0816844	14.4	0.567253
LELEKTKQLRL	3	21.1963	0.21882	0.311527	-0.0927077	8.1	-1.14454
LKEVINDRYDMLNISSLRQDGKTFIDFKKYNDK	6	27.2018	8.94553	7.74872	1.19682	27.9	4.28966
LKIAFGFNEPNGNLQYQGK	3	26.4171	4.21833	4.41503	-0.196698	14.4	-1.36596
LKIAFGFNEPNGNLQYQGKDITEFDFNFDQQTSQNIKNQLAELNATNIYTVLDKIKLN	6	35.769	14.3481	13.3929	0.95521	49.5	1.92972
LPLYISNPNYKVN	2	24.9332	3.66091	3.57493	0.0859839	8.1	1.06153
LPLYISNPNYKVNVY	2	27.5176	3.83929	3.51515	0.324141	9.9	3.27415
LSIPSSELENIPSENQYFQSAIWSGFIK	3	34.5262	6.12422	5.93039	0.193826	21.6	0.89734
LVAAYPIVHVD	2	24.512	0.276073	0.192349	0.0837242	7.2	1.16284
LYWTDSQNKKEVISSDNLQLPELKQKSSNSRKKR	6	22.0888	6.08552	5.20781	0.877712	27.9	3.14592
NAQDDFSSTPITMNYNQF	2	30.4281	5.04271	5.38417	-0.34146	13.5	-2.52934
NATNIYTVLDK	2	25.0066	3.81226	3.80803	0.00422676	8.1	0.0521822
NATNIYTVLDKIKLN	3	29.118	3.31995	3.34343	-0.0234787	11.7	-0.200673
NATNIYTVLDKIKLNAKMN	4	28.314	3.88178	3.80132	0.0804509	15.3	0.525823
NATNIYTVLDKIKLNAKMNIL	4	31.0726	3.71913	3.75068	-0.0315473	17.1	-0.184487
NATNIYTVLDKIKLNAKMNILIR	5	30.0389	3.26902	3.18275	0.0862733	18.9	0.456473
NDKLPLYISNPNYKVN	3	23.9166	4.34896	4.25046	0.0984951	10.8	0.911992
NFDQQTSQNIKNQLAEL	2	29.5783	4.25005	4.16089	0.0891655	13.5	0.660485
NFQAPMVVTSSTTGD	2	24.9067	4.62306	4.79035	-0.167293	10.8	-1.54901
NIATYNFENGRVR	3	21.877	2.55954	2.02584	0.533696	9.9	5.39087
NIAVGADESVVK	2	19.736	2.30273	2.11985	0.182883	9	2.03203
NIRYVNTGTAPIYNVLPTTSLVLGK	3	28.3883	3.11776	2.25921	0.858552	18.9	4.5426
NISSLRQDGKTFIDFKKYNDK	5	22.9723	5.0525	4.28583	0.766674	17.1	4.48347
NKRTFLSPWISNIHEK	4	24.2792	2.52344	2.54381	-0.0203672	11.7	-0.174079
NKRTFLSPWISNIHEKK	4	22.5992	2.78922	2.36956	0.419664	12.6	3.33067
NKRTFLSPWISNIHEKKG	5	22.2444	4.05722	4.00108	0.0561375	13.5	0.415833
NKRTFLSPWISNIHEKKGLTKYKSSPEK	6	20.9603	2.7879	2.35487	0.433025	21.6	2.00474
NKRTFLSPWISNIHEKKGLTKYKSSPEKWSTASDPYSDFEK	6	24.3135	5.90397	5.39877	0.505205	32.4	1.55927
NKRTFLSPWISNIHEKKGLTKYKSSPEKWSTASDPYSDFEKVTGR	6	25.507	3.99449	4.19166	-0.19717	36	-0.547695
NKRTFLSPWISNIHEKKGLTKYKSSPEKWSTASDPYSDFEKVTGRID	6	26.1757	4.02217	4.16004	-0.137867	37.8	-0.364727
NNIAVGADESVVK	2	19.5302	2.42139	2.8277	-0.40631	9.9	-4.10414
NRLLNESESSSQGLLGYYFSDLNFQ	3	34.1809	5.72524	6.1441	-0.418853	20.7	-2.02345
NTADTARLNANIR	3	15.4676	1.26049	1.34568	-0.0851885	9.9	-0.86049
NTADTARLNANIRYVNTGTAPIYNVLPTTSLVLGKNQTLATIK	5	28.3607	6.55865	5.91355	0.645097	35.1	1.83788
NTIINPSENGDTSTNGIKKIL	3	23.6214	6.15247	5.60079	0.55168	16.2	3.40543
NVLPTTSLVLGKNQTLATIK	3	25.0913	4.20974	4.16134	0.0484054	15.3	0.316375
PLVAAYPIVHVD	2	25.7148	0.547615	0.316747	0.230868	7.2	3.20651
PTTSLVLGKNQTLATIK	3	22.1186	4.01983	3.84637	0.173466	12.6	1.37671
QEVINKASNSNKIRLEKGRLY	5	18.8756	2.78935	2.85001	-0.060657	17.1	-0.354719
QEVINKASNSNKIRLEKGRLYQIK	4	18.6294	4.42736	4.01723	0.410132	19.8	2.07137
QEVINKASNSNKIRLEKGRLYQIKIQ	6	20.6143	3.69827	3.58228	0.115987	21.6	0.536978
QLAELNATNIYTVLDKIKLN	3	32.1741	6.41147	6.40944	0.00203302	16.2	0.0125495
QLSQILAPNNYYPSK	2	25.7432	1.61298	1.49813	0.114843	9.9	1.16003
QRENPTEKGLDFKLY	4	24.1002	2.09852	1.664	0.434522	10.8	4.02336
QSAIWSGFIK	2	28.7982	-0.0843421	-0.0245154	-0.0598267	7.2	-0.830927
QYFQSAIWSGFIK	2	31.7262	0.699437	0.828874	-0.129437	9.9	-1.30745
REVINSSTEGLLLNIDKDIRK	5	26.9046	5.65	5.53327	0.11673	17.1	0.682632
SESSSQGLLGYYFSDLNFQ	2	35.6363	2.29956	2.70168	-0.402119	15.3	-2.62823
SEVLPQIQETTAR	3	22.0073	1.31554	1.36677	-0.0512296	9	-0.569218
SEVLPQIQETTARIIFN	2	30.5865	1.96475	2.01936	-0.054609	12.6	-0.433405
SEVLPQIQETTARIIFNGK	3	29.451	1.69906	1.52945	0.169608	14.4	1.17784
SEVLPQIQETTARIIFNGKDLNL	3	31.643	3.339	3.22833	0.110668	18	0.61482
SEVLPQIQETTARIIFNGKDLNLVER	4	30.0985	3.9416	3.96574	-0.0241344	20.7	-0.116591
SLAGERTW	2	22.1275	2.83686	2.59024	0.246615	5.4	4.56694
SLRQDGKTFIDFKKYNDK	5	20.8775	4.96558	4.24255	0.723031	14.4	5.02105
SLSLAGERTW	2	25.4837	3.24747	3.03063	0.216837	7.2	3.01162
SLSLAGERTWAETMGL	2	31.7404	5.93146	5.89392	0.0375416	12.6	0.297949
SQILAPNNYYPSK	2	22.8509	3.792	3.75477	0.0372326	8.1	0.459661
SQILAPNNYYPSKNLAPIAL	2	28.3025	5.42701	5.34376	0.0832444	13.5	0.616625
SQILAPNNYYPSKNLAPIALNAQDD	3	27.0156	7.84249	7.71708	0.125417	18	0.696762
SQNKKEVISSDNLQLPELKQKSSNSRKKR	5	17.8079	4.25955	3.21946	1.04009	23.4	4.44481
SSPEKWSTASDPYSDFEKVTGRID	4	27.4491	3.4168	3.07215	0.344646	18	1.9147
SSTEGLLLNIDK	2	25.9849	4.4258	4.27154	0.154262	9	1.71402
SSTEGLLLNIDKDIR	3	27.512	3.60191	3.43666	0.165254	11.7	1.41243
SSTEGLLLNIDKDIRK	3	25.8754	4.51088	3.88722	0.62366	12.6	4.94968
SSTEGLLLNIDKDIRKIL	3	33.598	5.26115	5.29262	-0.0314711	14.4	-0.218549
SSTEGLLLNIDKDIRKILSGYIVE	3	37.6669	7.43489	7.44748	-0.0126	19.8	-0.0636362
STSAGPTVPDRDNDGIPDSLEVEGYTVDVK	3	26.7041	5.19729	4.4474	0.749896	22.5	3.33287
STSAGPTVPDRDNDGIPDSLEVEGYTVDVKNKRT	5	24.3064	5.40939	4.24725	1.16214	26.1	4.45264
STSAGPTVPDRDNDGIPDSLEVEGYTVDVKNKRTFLSPWISNIHEKK	6	27.3545	6.77885	5.32984	1.44901	36.9	3.92687
STSAGPTVPDRDNDGIPDSLEVEGYTVDVKNKRTFLSPWISNIHEKKGLTK	6	26.9541	9.46709	9.35963	0.107455	40.5	0.265321
TASDPYSDFEK	2	22.6868	3.14592	3.44877	-0.302842	7.2	-4.20614
TDQVYGNIATYNFENGRVR	3	24.9843	7.67905	6.83697	0.842077	15.3	5.50377
TEGLKEVINDRYD	3	22.4636	4.17877	3.72677	0.451999	9.9	4.56565
TEGLKEVINDRYDMLNISSLRQDGKTFID	5	29.0458	9.27304	8.69705	0.575994	24.3	2.37035
TEGLKEVINDRYDMLNISSLRQDGKTFIDFKKYNDK	6	28.4402	11.4567	10.5719	0.884796	30.6	2.89149
TFLSPWISNIHEK	3	28.2179	2.7321	3.4115	-0.679401	9	-7.54889
TFLSPWISNIHEKK	3	26.0362	2.74464	2.83117	-0.0865394	9.9	-0.874136
TFLSPWISNIHEKKGLTK	4	24.876	5.03813	5.00568	0.0324478	13.5	0.240354
TGSNWSEVLPQIQETTAR	2	28.0236	2.35376	2.66087	-0.307109	13.5	-2.27488
TGSNWSEVLPQIQETTARIIFN	3	35.1367	6.24394	6.05876	0.185181	17.1	1.08293
TGSNWSEVLPQIQETTARIIFNGK	3	34.0174	4.17431	4.37646	-0.202146	18.9	-1.06956
TGSNWSEVLPQIQETTARIIFNGKDLNL	3	35.1225	5.96619	6.29851	-0.332315	22.5	-1.47695
TGSNWSEVLPQIQETTARIIFNGKDLNLVERRIA	5	33.6526	8.43253	9.02251	-0.589978	27.9	-2.11461
TIINPSENGDTSTNGIKK	3	16.7527	6.85185	6.54393	0.307925	13.5	2.28093
TIINPSENGDTSTNGIKKIL	3	23.486	5.39668	4.96775	0.428927	15.3	2.80345
TIINPSENGDTSTNGIKKILIF	3	28.2981	4.86286	4.49358	0.369277	17.1	2.15952
TIINPSENGDTSTNGIKKILIFSKKGYEIG	5	26.4056	7.27328	7.23917	0.034113	24.3	0.140383
TTARIIFNGK	3	18.2763	0.833865	0.747575	0.0862906	7.2	1.19848
TTARIIFNGKDLNLVERRIAAVNPSDPLETTKPDMTLKEALK	6	28.1952	9.69949	7.47195	2.22754	33.3	6.68931
TYNFENGRVR	3	18.8613	4.29993	3.58255	0.717373	7.2	9.96351
TYNFENGRVRVD	3	21.7764	5.55301	4.72658	0.82643	9	9.18255
VAAYPIVH	2	19.4654	0.291026	0.202577	0.0884495	4.5	1.96555
VAAYPIVHVD	2	22.9153	0.484193	0.395552	0.0886413	6.3	1.407
VAAYPIVHVDM	2	25.9058	0.45553	0.602867	-0.147337	7.2	-2.04634
VDDQEVINKASNSNKIRLEKGRLYQIK	5	21.4573	6.52792	6.1125	0.415425	22.5	1.84633
VDTGSNWSEVLPQIQETTAR	2	28.5133	4.33628	4.24516	0.0911157	15.3	0.595527
VDTGSNWSEVLPQIQETTARIIFNGKDLNL	3	35.8057	4.47163	4.6436	-0.17197	24.3	-0.707697
VERRIAAVNPSDPLETTKPDMTLKEA	5	21.9387	9.231	7.70789	1.52311	18.9	8.05877
VINSSTEGLLLNIDKDIR	3	28.8944	4.74333	4.49701	0.24632	14.4	1.71055
VINSSTEGLLLNIDKDIRK	3	27.3899	2.20908	1.19304	1.01604	15.3	6.6408
VINSSTEGLLLNIDKDIRKIL	4	34.7027	5.32407	5.1708	0.153264	17.1	0.896279
VISSDNLQLPELKQKSSNSRKKR	5	18.7147	1.9104	1.29046	0.619935	18	3.44409
VKKSDEYTFATSADNHVTMWVDDQEVINKASNSNKIRLEKGRLYQIK	6	26.8836	5.89297	6.14339	-0.25042	40.5	-0.61832
VKNKRTFLSPWISNIHEK	5	22.9428	2.79574	2.47289	0.32285	13.5	2.39148
VKNKRTFLSPWISNIHEKK	6	21.3964	2.82303	2.55191	0.27112	14.4	1.88278
VKNKRTFLSPWISNIHEKKGLTK	6	21.1848	4.8407	5.22871	-0.388017	18	-2.15565
VLGKNQTLATIK	3	17.466	3.08154	3.16265	-0.0811056	9	-0.901174
VLPQIQETTAR	2	20.2705	0.42312	0.537891	-0.114771	7.2	-1.59404
VNPSDPLETTKPDMTL	2	25.8293	6.44978	2.54917	3.90061	9.9	39.4001
VNPSDPLETTKPDMTLKEA	3	23.277	4.34264	1.81447	2.52817	12.6	20.0648
VNPSDPLETTKPDMTLKEALK	4	23.698	3.75551	1.64714	2.10837	14.4	14.6414
VTKENTIINPSENGDTSTNGIKK	4	16.9223	8.34568	8.0787	0.266983	18	1.48324
VTKENTIINPSENGDTSTNGIKKIL	3	22.7245	7.3129	6.65005	0.662852	19.8	3.34774
VTKENTIINPSENGDTSTNGIKKILIF	4	26.865	6.33581	5.98981	0.346	21.6	1.60185
VTKENTIINPSENGDTSTNGIKKILIFSKKGYEIG	5	25.6084	10.2497	9.99567	0.254075	28.8	0.882205
VVTSSTTGDLSIPSSELENIPSENQYFQSAIWSGFIK	3	34.5191	5.71352	5.43123	0.282293	29.7	0.950482
VYAVTKENTIINPSENGDTSTNGIKK	4	19.7068	7.5975	7.01656	0.580939	20.7	2.80647
VYAVTKENTIINPSENGDTSTNGIKKIL	4	23.8453	7.05495	6.55985	0.495099	22.5	2.20044
VYAVTKENTIINPSENGDTSTNGIKKILIF	4	27.4277	6.8352	6.37459	0.460607	24.3	1.8955
VYAVTKENTIINPSENGDTSTNGIKKILIFSKKGYEIG	5	26.0176	10.0791	9.68722	0.391877	31.5	1.24406
VYGNIATYNFENGRVR	3	23.9798	6.87495	5.17001	1.70494	12.6	13.5313
WSTASDPYSDFEK	2	25.793	0.950689	1.14628	-0.195596	9	-2.17328
WSTASDPYSDFEKVTGRID	3	28.4659	2.03737	1.87621	0.16116	14.4	1.11916
WTDSQNKKEVISSDNLQLPELKQKSSNSRKK	6	20.1466	4.90421	4.31236	0.59185	25.2	2.34861
WTDSQNKKEVISSDNLQLPELKQKSSNSRKKR	5	19.6045	4.42228	3.45136	0.970923	26.1	3.72001
WVDDQEVINKASNSNKIRLEKGRLYQIK	6	23.0745	9.68167	9.87552	-0.193854	23.4	-0.828435
YISNPNYKVN	2	18.5492	1.98227	1.85435	0.127913	6.3	2.03037
YISNPNYKVNVY	2	23.2858	1.49666	1.34156	0.155095	8.1	1.91476
YKSSPEKWSTASDPYSDFEK	3	23.2953	1.08587	0.797912	0.287959	14.4	1.99972
YKSSPEKWSTASDPYSDFEKVTGRID	4	26.3916	2.60784	2.22269	0.385147	19.8	1.94519
YKSSPEKWSTASDPYSDFEKVTGRIDKNVSPEARHPL	6	25.9008	8.44923	7.98519	0.464036	27.9	1.66321
YKSSPEKWSTASDPYSDFEKVTGRIDKNVSPEARHPLVAAYPIVHVD	6	27.1422	4.80781	4.06647	0.741335	36	2.05926
YQRENPTEKGLDFK	4	18.5767	4.08043	3.91868	0.161745	9.9	1.63379
YTVDVKNKRTFLSPWISNIHEKK	5	23.4011	4.39154	4.42375	-0.032212	18	-0.178956
YVNTGTAPIYNVLPTTSLVLGK	2	29.826	2.80833	3.49291	-0.684576	16.2	-4.22578
YVNTGTAPIYNVLPTTSLVLGKN	2	29.5251	4.86064	4.52575	0.334896	17.1	1.95845
YVNTGTAPIYNVLPTTSLVLGKNQTL	3	30.3894	4.3985	4.02258	0.375916	19.8	1.89857
YVNTGTAPIYNVLPTTSLVLGKNQTLATIK	3	29.1083	5.64244	5.08946	0.552978	23.4	2.36315
YVNTGTAPIYNVLPTTSLVLGKNQTLATIKAKENQLSQILAPNNYYPSKNLAPIAL	5	33.4426	19.8876	19.412	0.475547	44.1	1.07834
YWTDSQNKKEVISSDNLQLPELKQKSSNSRKKR	6	21.091	0.511099	0.148917	0.362181	27	1.34141
